1 **miRNA profiling of primate cervicovaginal lavage and extracellular vesicles reveals miR-**  
2 **186-5p as a potential retroviral restriction factor in macrophages**

3 Zezhou Zhao<sup>1,#</sup>, Dillon C. Muth<sup>1,3,#</sup>, Kathleen Mulka<sup>1</sup>, Bonita H. Powell<sup>1</sup>, Grace V. Hancock<sup>1,&</sup>,  
4 Zhaohao Liao<sup>1</sup>, Kelly A. Metcalf Pate<sup>1</sup>, Kenneth W. Witwer<sup>1,2,3,\*</sup>

5 <sup>1</sup>Department of Molecular and Comparative Pathobiology, <sup>2</sup>Department of Neurology, and  
6 <sup>3</sup>Cellular and Molecular Medicine Program, The Johns Hopkins University School of Medicine,  
7 Baltimore, MD, USA.

8 <sup>#</sup>These authors contributed equally to this work

9 <sup>&</sup>Currently at Molecular Biology Institute, University of California, Los Angeles, Los Angeles,  
10 California, USA.

11 \*Address correspondence to:

12 Kenneth W. Witwer, PhD

13 733 N. Broadway

14 Miller Research Building 829

15 Baltimore, MD 21205

16 Phone: 1-410-955-9770

17 Fax: 1-410-955-9823

18 Email: kwitwer1@jhmi.edu

19

- 20 **Keywords:** extracellular vesicle, exosome, microvesicle, microRNA, biomarker, HIV-1,  
21 cervicovaginal lavage, SIV, restriction factor

## 22 **Abstract**

23 **Introduction:** The goal of this study was to characterize extracellular vesicles (EVs) and  
24 miRNA profiles of primate cervicovaginal lavage (CVL) during the menstrual cycle and simian  
25 immunodeficiency virus (SIV) infection, and to determine if CVL-associated miRNAs might  
26 influence replication of retroviruses.

27 **Methods:** CVL and peripheral blood were collected for five weeks from two uninfected and four  
28 SIV-infected macaques. EVs were enriched by stepped ultracentrifugation and characterized by  
29 population-level and single vesicle analyses. miRNA profiles were assessed with a medium-  
30 throughput stem-loop/hydrolysis probe qPCR platform and validated by targeted qPCR assays.  
31 Influence of miR-186-5p (“miR-186”) on HIV protein and RNA production was monitored in  
32 monocyte-derived macrophages.

33 **Results:** Although menstrual hormone cycling was abnormal in infected subjects, EV  
34 concentration increased with progesterone in uninfected subjects. miRNAs were present  
35 predominantly in the EV-depleted supernatant fraction of CVL. Few changes in miRNA levels  
36 correlated with the menstrual cycle or SIV infection. miR-186, depleted in retroviral infection,  
37 was investigated for a possible role in controlling retroviral infection. miR-186 inhibited HIV  
38 production when transfected into monocyte-derived macrophages.

39 **Conclusions:** We report profiles of a targeted set of miRNAs in CVL fractions. The menstrual  
40 cycle may affect quantity of EVs recovered from CVL, but has only minor effects on abundance  
41 of the miRNAs we examined. miR-186 decline appears to be associated with SIV infection, and  
42 miR-186 inhibits HIV replication in macrophages in vitro. Further studies are required to  
43 characterize the role of EVs and small RNAs as biomarkers of disease in the reproductive tract.

## 44 **Introduction**

45 The cervicovaginal canal is a potential source of biological markers in forensics investigations  
46 [1–4] and reproductive tract cancers [5] and infections [6]. Cervicovaginal secretions may be  
47 collected by swab, tampon, or other methods, or secretion components may be liberated by a  
48 buffered wash solution and collected as cervicovaginal lavage (CVL). Beyond utility as  
49 biomarkers, constituents of cervicovaginal secretions including proteins [7] and certain microbes  
50 [8] may have protective roles, for example in wound healing and against HIV-1 infection [9–16].  
51 Secreted components may also change quantitatively or qualitatively during the menstrual cycle  
52 [17].

53 Compared with secreted proteins and the microbiome, several components of cervicovaginal  
54 fluids are less well understood, including extracellular RNAs (exRNAs) and their carriers, such  
55 as extracellular vesicles (EVs) and ribonucleoprotein complexes (exRNPs). EVs are potential  
56 regulators of cell behavior in paracrine and endocrine fashion due to their reported abilities to  
57 transfer proteins, nucleic acids, sugars, and lipids between cells [18]. EVs comprise a wide array  
58 of double-leaflet membrane extracellular particles, including exosomes and microvesicles [19],  
59 and range in diameter from 30 nm to well over one micron (large oncosomes) [20]. EV  
60 macromolecular composition tends to reflect, but is not necessarily identical to, that of the cell of  
61 origin [21]. EVs have been isolated from most cells, as well as biological fluids [18, 22],  
62 including cervicovaginal secretions of humans [23] and rhesus macaques [24].

63 microRNAs (miRNAs) are one of the most studied classes of exRNA. These noncoding RNAs  
64 average 22 nucleotides in length and, in some cases, fine-tune the expression of target transcripts  
65 [25, 26]. Released from cells by several routes, miRNAs are among the most frequently  
66 examined biomarker candidates in biofluids and are reported to be transmitted via EVs. miRNAs

67 are found not only in EVs, but also in free Argonaute-containing protein complexes; the latter  
68 may outnumber the former, at least in blood [27, 28]. miRNAs are also highly conserved [26],  
69 and abundant species typically have 100% identity in humans and nonhuman primates [29]. (For  
70 this reason, we will refer to hsa- (Homo sapiens) and mml- (*Macaca mulatta*) miRNAs without  
71 the species designation unless otherwise warranted by sequence disparity.) While miRNAs have  
72 been profiled in cervicovaginal secretions and menstrual blood, mostly in the forensics setting [4,  
73 30, 31], their associations with EV and exRNP fractions require further study. A recent  
74 publication reported that EVs from healthy vaginal secretions inhibited HIV-1 infection [23].  
75 Another report found that CVL EVs (termed “exosomes”) were present at higher concentrations  
76 in cervical cancer, and that two miRNAs were also upregulated [5]. Our group described a  
77 reduction of CVL EVs in a severe endometriosis case compared with reproductively healthy  
78 primates [24]. However, our study, along with others, was limited by the absence of molecular  
79 profiling of EV cargo [24].

80 Here, we performed targeted miRNA profiling of EV-enriched and -depleted fractions of CVL  
81 and vaginal secretions collected from healthy and retrovirus-infected rhesus macaques. We  
82 queried how CVL EVs and miRNAs are affected by the menstrual cycle, an important potential  
83 confounder of biomarker studies. Similarly, we assessed possible associations with simian  
84 immunodeficiency virus (SIV) infection. We report an association of miR-186 levels with SIV  
85 infection and find that this miRNA also appears to act in an antiretroviral fashion in HIV  
86 infection of macrophages. These studies provide baseline information for easily accessed CVL  
87 markers including EVs and miRNAs that may become useful tools in the clinic.

## 88 **METHODS**

### 89 **Sample Collection**

90 CVL and whole blood samples were collected weekly for five weeks from two uninfected  
91 (control) and four SIVmac251-infected (infected) rhesus macaques (*Macaca mulatta*) as  
92 previously described [24]. All macaques were negative for simian T-cell leukemia virus and  
93 simian type D retrovirus and were inoculated intravenously. Animals were sedated with  
94 ketamine at a dose of 7-10 mg/kg prior to all procedures. CVL was performed by washing the  
95 cervicovaginal cavity with 3 mL of phosphate buffered saline (PBS, Thermo Fisher Scientific,  
96 Waltham, MA, USA) directed into the cervicovaginal canal and re-aspirated using the same  
97 syringe. Materials and procedures for sample collection are depicted in Supplemental Figure 1.  
98 Volumes of CVL yield across collection dates were documented in Supplemental Table 1. Whole  
99 blood (3 mL) was collected by venipuncture into syringes containing acid citrate dextrose  
100 solution (ACD) (Sigma Aldrich, St. Louis, MO, USA).

101

### 102 **Study Approvals**

103 All animal studies were approved by the Johns Hopkins University Institutional Animal Care and  
104 Use Committee (IACUC) and conducted in accordance with the Weatherall Report, the Guide  
105 for the Care and Use of Laboratory Animals, and the USDA Animal Welfare Act.

106

### 107 **Sample Processing**

108 Sample processing began within a maximum of 60 minutes of collection and utilized serial  
109 centrifugation steps to enrich EVs as described previously [32], based on a standard EV isolation  
110 protocol [33]. Specifically, fluids were centrifuged: (1)  $1,000 \times g$  for 15mins at  $4^{\circ}\text{C}$  in a tabletop  
111 centrifuge; (2)  $10,000 \times g$  for 20 mins at  $4^{\circ}\text{C}$ ; and (3)  $110,000 \times g$  for 2 hours at  $4^{\circ}\text{C}$  with a  
112 Sorvall Discovery SE ultracentrifuge (Thermo Fisher Scientific) with an AH-650 rotor (k factor:  
113 53.0) (Supplemental Figure 1B). Following each centrifugation step, most supernatant was  
114 removed, taking care not to disturb the pellet. After each step, supernatant was set aside for  
115 nanoparticle tracking analysis (NTA;  $200 \mu\text{L}$ ), and RNA isolation ( $200 \mu\text{L}$ ) following the second  
116 and third steps. The pellet was resuspended in  $400 \mu\text{L}$  of PBS after each centrifugation step.  
117 After the final step, the remaining ultracentrifuged supernatant was concentrated to  
118 approximately  $220 \mu\text{L}$  using Amicon Ultra-2  $10 \text{ kDa}$  molecular weight cutoff filters (Merck  
119 KGaA, Darmstadt, Germany).  $200 \mu\text{L}$  of the concentrate was used for RNA isolation and the  
120 remainder was retained for NTA. All samples reserved for RNA isolation were mixed with  $62.6$   
121  $\mu\text{L}$  of RNA isolation buffer (Exiqon, Vedbaek, Denmark) containing three micrograms of  
122 glycogen and  $5 \text{ pg}$  of synthetic cel-miR-39 as previously described [34]. Processed samples were  
123 analyzed immediately or frozen at  $-80^{\circ}\text{C}$  until further use.

124 For plasma, whole blood was centrifuged at  $800 \times g$  for 10 mins at  $25^{\circ}\text{C}$ . Supernatant was  
125 centrifuged twice at  $2,500 \times g$  for 10 mins at  $25^{\circ}\text{C}$ . The resulting platelet-poor plasma was  
126 aliquoted and frozen at  $-80^{\circ}\text{C}$ .

127

## 128 **Hormone Analysis**

129 Levels of progesterone (P4) and estradiol-17b (E2) were measured in plasma samples shipped  
130 overnight on dry ice to the Endocrine Technology and Support Core Lab at the Oregon National  
131 Primate Research Center, Oregon Health and Science University.

132

### 133 **Nanoparticle Tracking Analysis**

134 Extracellular particle concentration was determined using a NanoSight NS500 NTA system  
135 (Malvern, Worcestershire, UK). Cervicovaginal lavage samples were diluted as needed and  
136 specified in Supplemental Table 2 to ensure optimal NTA analysis. At least five 20-second  
137 videos were recorded for each sample at a camera setting of 12. Data were analyzed at a  
138 detection threshold of two using NanoSight software version 3.0.

139

### 140 **Western Blot**

141 Western blot was used to detect the presence of EV protein markers and the absence of calnexin  
142 (endoplasmic reticulum marker) in CVL and enriched CVL EVs. Because of low quantities, both  
143 CVL and enriched EVs were pooled as indicated in Supplemental Table 3. 20  $\mu$ L of pooled  
144 samples were lysed with 5  $\mu$ L 1:1 mixture of RIPA buffer (Cell Signaling Technology, Danvers,  
145 MA. Cat #: 9806S) and protease inhibitor (Santa Cruz Biotechnology, Dallas, TX. Cat #:  
146 sc29131). 8  $\mu$ L of Laemmli 4X sample buffer (BioRad, Hercules, CA. Cat #:161-0747 Lot #:  
147 64077737) was added per sample, and 30  $\mu$ L of each was loaded into a Criterion TGX 10% gel  
148 (BioRad, Hercules, CA. Cat #: 5671034 Lot #: 64115589) after 5 mins of 95°C incubation. The  
149 gel was electrophoresed by application of 100V for 100 mins. The proteins were then transferred  
150 to a PVDF membrane (BioRad, Hercules, CA), which was blocked with 5% milk (BioRad,



151 Hercules, CA. Cat #: 1706404. Lot #: 64047053) in PBS+0.1% Tween®20 (Sigma-Aldrich, St.  
152 Louis, MO Cat #: 274348 Lot #: MKBF5463V) for 1 hour. The membrane was subsequently  
153 incubated with mouse anti-human CD63 (BD Biosciences, San Jose, CA Cat #: 556019 Lot #:  
154 6355939) and mouse monoclonal IgG<sub>2b</sub> CD81 (Santa Cruz Biotechnology, Dallas, TX Cat #:  
155 166029 Lot #: L1015) primary antibodies, at a concentration of 0.5 µg/mL for 1 h. After washing  
156 the membrane, it was incubated with a goat anti-mouse IgG-HRP secondary antibody (Santa  
157 Cruz Biotechnology, Dallas, TX Cat #: sc-2005 Lot #: B1616) at a 1:10,000 dilution for 1 h. The  
158 membrane was then incubated with a 1:1 mixture of SuperSignal West Pico Stable Peroxide  
159 solution and Luminol Enhancer solution (Thermo Scientific, Rockford, IL Cat #: 34080 Lot #:  
160 SD246944) for 5 min. The membrane was visualized on chemiluminescence film (Denville  
161 Scientific, Holliston, MA Cat #: E3018 Lot #:79608091) for up to 150 seconds. The second blot  
162 was done in a reducing environment using 10mM DTT (Promega, Madison, WI Cat #: P1171  
163 Lot #: 0000198991). Same procedures were followed with rabbit anti-human TSG101 (Cat #:  
164 ab125011 Lot #:GR180132-14), rabbit anti-syntenin (Abcam, Cambridge, MA Cat #: ab133267  
165 Lot #: GR89146-10), and rabbit anti-calnexin (Abcam, Cambridge, MA Cat #: ab22595 Lot  
166 #:GR243392-3) primary antibodies. Subsequent incubation with goat anti-rabbit IgG-HRP  
167 secondary antibody (Abcam, Cambridge, MA Cat #: sc-2204 Lot #: B2216). All antibodies were  
168 used at the same concentration as the first blot. Film was exposed to the membrane for up to 8  
169 mins for visualization.

170

## 171 **Electron Microscopy**

172 Gold grids were floated on 2% paraformaldehyde-fixed CVL-derived samples for two minutes,  
173 then negatively stained with uranyl acetate for 22 seconds. Grids were observed with a Hitachi

174 7600 transmission electron microscope in the Johns Hopkins Institute for Basic Biomedical  
175 Sciences Microscope Facility.

176

### 177 **Total RNA Isolation and Quality Control**

178 RNA isolation work flow is shown in Supplemental Figure 1C. RNA lysis buffer was added into  
179 each sample as described above prior to freezing (-80 °C). Total RNA was isolated from thawed  
180 samples using the miRCURY RNA Isolation Kit-Biofluids (Exiqon) per manufacturer's protocol  
181 with minor modifications as previously described (10). Total RNA was eluted with 50 µL  
182 RNase-free water and stored at -80°C. As quality control, expression levels of several small  
183 RNAs including snRNA U6, miR-16-5p, miR-223-3p, and the spiked-in synthetic cel-miR-39  
184 were assessed by TaqMan miRNA assays (Applied Biosystems/ Life Technologies, Carlsbad,  
185 California, USA) [35].

186

### 187 **miRNA Profiling by TaqMan Low-Density Array**

188 A custom 48-feature TaqMan low-density array (TLDA) (11) was ordered from Thermo Fisher,  
189 with features chosen based on results of a human CVL pilot study (G. Hancock and K.W.  
190 Witwer, unpublished data). Stem-loop primer reverse transcription and pre-amplification steps  
191 were conducted using the manufacturer's reagents as previously described [36] but with 14  
192 cycles of pre-amplification. Real time quantitative PCR was performed with a QuantStudio 12K  
193 instrument (Johns Hopkins University DNA Analysis Facility). Data were collected using SDS  
194 software and Cq values extracted with Expression Suite v1.0.4 (Thermo Fisher Scientific,

195 Waltham, MA USA). Raw Cq values were adjusted by a factor determined from the geometric  
196 mean of 10 relatively invariant miRNAs. The selection process for these invariant miRNAs was  
197 to 1) rank miRNAs by coefficient of variation; 2) remove miRNAs with high average Cq (>30),  
198 non-miRNAs, and those with low amplification score; 3) select the lowest-CV member of  
199 miRNA families (e.g., the 17/92 clusters); and 4) pick the top 10 remaining candidates by CV:  
200 let-7b-5p, -miR-21-5p, -27a-3p, -28-3p, -29a-3p, -30b-5p, -92a-3p, -197-3p, -200c-3p, and -  
201 320a-3p.

202

### 203 **Individual RT-qPCR Assays**

204 Individual TaqMan miRNA qPCR assays were performed as previously described [36] for miRs-  
205 19a-3p (Thermo Fisher Assay ID #000395), -186-5p (Thermo Fisher Assay ID #002285), -451a-  
206 5p (Thermo Fisher Assay ID #001105), -200c-3p (Thermo Fisher Assay ID #002300), -222-3p  
207 (Thermo Fisher Assay ID #002276), -193b-3p (Thermo Fisher Assay ID #002367), -181a-5p  
208 (Thermo Fisher Assay ID #000480), and -125b-5p (Thermo Fisher Assay ID #00449). We also  
209 measured miR-375-3p (Thermo Fisher Assay ID #00564), which was not included on the array.  
210 Data were adjusted to Cqs of miR-16-5p and miR-19a-3p, but conclusions were robust to  
211 different normalization methods.

212

### 213 **Blood Cell Isolation and Monocyte-Derived Macrophage Culture**

214 Total PBMCs were obtained from freshly drawn blood from human donors under a Johns  
215 Hopkins University School of Medicine IRB-approved protocol (JHU IRB #CR00011400).  
216 Blood was mixed with 10% Acid Citrate Dextrose (ACD) (Sigma Aldrich, St. Louis, MO Cat #:

217 C3821 Lot #: SLBQ6570V) with gentle mixing by inversion. Within 15 minutes of draw, blood  
218 was diluted with equal volume of PBS+ 2% FBS, gently layered onto room temperature Ficoll  
219 (Biosciences AB, Uppsala, Sweden Cat #:17-1440-03 Lot #: 10253776) in Sepmate-50 tubes  
220 (STEMCELL Technologies, Vancouver, BC, Canada Cat #: 15450 Lot #: 06102016) and  
221 centrifuged for 10 minutes at  $1200 \times g$ . Plasma and PBMC fractions were removed, washed in  
222 PBS+ 2% FBS, and pelleted at  $300 \times g$  for 8 minutes. Pellets from 5 tubes were combined by  
223 resuspension in 10 mL RBC lysis buffer (4.15 g  $\text{NH}_4\text{Cl}$ , 0.5 g  $\text{KHCO}_3$ , 0.15 g EDTA in  
224 450 mL  $\text{H}_2\text{O}$ ; pH adjusted to 7.2–7.3; volume adjusted to 500 mL and filter-sterilized); total  
225 volume was brought to 40 mL with RBC lysis buffer. After incubation at  $37^\circ\text{C}$  for 5 mins, the  
226 suspension was centrifuged at  $400 \times g$  for 6 mins at room temperature. The cell pellet was  
227 resuspended in Macrophage Differentiation Medium with 20% FBS (MDM20) to a final  
228 concentration of  $2 \times 10^6$  cells/mL. PBMCs were plated at  $4 \times 10^6$  cells per well in 12-well plates  
229 and cultured in MDM20 for 7 days. One half of the total volume of medium was replaced on day  
230 3. On day 7, cells were washed 3 times with PBS to remove non-adherent cells. The medium was  
231 replaced with Macrophage Differentiation Medium with 10% serum (MDM10) and cultured  
232 overnight prior to transfection.

233

### 234 **miRNA Mimic Transfection**

235 Differentiated macrophages were transfected with 50 nM miRNA-186-5p using Lipofectamine  
236 2000 (Invitrogen/Life Technologies, Carlsbad, CA Cat #: 11668-019 Lot #:1467572) diluted in  
237 OptiMEM Reduced Serum Medium (Gibco, Grand Island, NY Cat #: 31985-070 Lot #:  
238 1762285). Controls included mock transfections and transfection of 50 nM siRNA oligo labeled  
239 with Alexa Fluor 555 (Invitrogen, Fredrick, MD Cat #: 14750-100 Lot #: 1863892). Plates were

240 incubated for 6 hours at 37 °C. After incubation, successful transfection was confirmed by  
241 examining uptake of labeled siRNA with an Eclipse TE200 inverted microscope (Nikon  
242 Instruments, Melville, NY). Transfection medium was removed. The plates were washed with  
243 PBS and refed with 2 mL fresh MDM10 medium.

244

### 245 **HIV Infection**

246 HIV-1 BaL stocks were generated from infected PM1 T-lymphocytic cells and stored at  $-80^{\circ}\text{C}$ .  
247 24 hours after mimic or mock transfections, macrophages were infected with HIV BaL and  
248 incubated overnight (stock, 80  $\mu\text{g}$  p24/mL, diluted to 200 ng p24/mL). At days 3, 6, and 9 post-  
249 infection, 500  $\mu\text{L}$  supernatant was collected for p24 release assays and cells were lysed with 600  
250  $\mu\text{L}$  mirVana lysis buffer for subsequent RNA isolation and analysis.

251

### 252 **HIV p24 Antigen ELISA**

253 Supernatant samples were lysed with Triton-X at a final concentration of 1%. The DuPont HIV-1  
254 p24 Core Profile ELISA kit (Perkin Elmer, Waltham, MA Cat #: NEK050B001KT Lot #: 990-  
255 17041) was used per manufacturer's instructions to measure p24 concentration based on the  
256 provided standard.

257

### 258 **Total RNA Isolation**

259 Total RNA was isolated using the mirVana miRNA Isolation Kit per manufacturer's protocol  
260 (Ambion, Vilnius, Lithuania Cat #: AM1560 Lot #: 1211082). Note that this procedure yields  
261 total RNA, not just small RNAs. After elution with 100  $\mu\text{L}$  RNase-free water, nucleic acid

262 concentration was measured using a NanoDrop 1000 spectrophotometer (Thermo Fisher  
263 Scientific, Wilmington, DE). RNA isolates were stored at -80 °C.

264

### 265 **HIV Gag RNA RT-qPCR**

266 Real-time one-step reverse transcription quantitative PCR was performed with the QuantiTect  
267 Virus Kit (Qiagen, Foster City, CA Cat #:211011 Lot #: 154030803). Each 25 µl reaction  
268 mixture contained 15 µl of master mix containing HIV-1 RNA standard, 100 µM of FAM dye  
269 and IBFQ quencher labeled Gag probe (5' ATT ATC AGA AGG AGC CAC CCC ACA AGA  
270 3'), 600 nM each of Gag1 forward primer (5'TCA GCC CAG AAG TAA TAC CCA TGT 3')  
271 and Gag2 reverse primer (5' CAC TGT GTT TAG CAT GGT GTT T 3'), nuclease-free water,  
272 and QuantiTect Virus RT mix, and 10 µL serial-diluted standard or template RNA. No-template  
273 control and no reverse transcriptase controls were included. Linear standard curve was generated  
274 by plotting the log copy number versus the quantification cycle ( $C_q$ ) value. Log-transformed Gag  
275 copy number was calculated based on the standard curve.

276

### 277 **Macrophage Viability Assessment by MTT Cell Proliferation Assay**

278 5 mg 3-(4,5-Dimethylthiazol-2-yl)-2,5- diphenyltetrazolium bromide (MTT) (Vybrant MTT cell  
279 proliferation assay kit, Invitrogen, Eugene, OR Cat #: V13154 Lot #: 1897699) was dissolved in  
280 1mL of PBS and incubated in the dark for 20 mins. Dissolved MTT was then diluted in 12 mL of  
281 phenol red-free MDM10 medium. Macrophages in 12 well plates were washed with 2 mL PBS.  
282 1 mL of MTT/MDM10 medium was added to each well and incubated at 37 °C for 45 mins. 12  
283 mL of 0.01N hydrochloric acid was added to dissolve SDS, and 1 mL acidified SDS solution was  
284 added to each well and mixed thoroughly until all formazan crystals were dissolved. Formazan

285 quantification was performed using an iMark microplate absorbance reader (BioRad, Hercules,  
286 CA) with a 570 nm test wavelength. Data were expressed as mean absorbance value (OD) of  
287 duplicate samples plus standard error of the mean.

288

## 289 **Data analysis**

290 Data processing and analysis were conducted using tools from Microsoft Excel (geometric mean  
291 normalization), Apple Numbers, GraphPad Prism, the MultiExperiment Viewer, and  
292 R/BioConductor packages including pheatmap (<http://CRAN.R-project.org/package=pheatmap>;  
293 quantile normalization, Euclidean distance, self-organizing maps, self-organizing tree algorithms,  
294 k-means clustering). Figures and tables were prepared using R Studio, Microsoft Excel and  
295 Word, Apple Numbers and Keynote, GraphPad Prism, and Adobe Photoshop.

296

## 297 **Data Availability and Rigor and Reproducibility**

298 Array data have been deposited with the Gene Expression Omnibus (GEO) [37] as GSE107856.  
299 Data in other formats are available upon request. To the extent that sample quantities would  
300 allow, the MISEV2014 recommendations for EV studies were followed [38, 39], and the EV  
301 experiments have been registered with the EV-TRACK knowledgebase [40] with preliminary  
302 EV-TRACK code XL5296IL.

303

304 **RESULTS**

305 **Abnormal menstrual cycle of SIV-infected macaques and ovulation-associated changes in**  
306 **levels of CVL EV-enriched particles**

307 Plasma and CVL were collected from two control and four SIV-infected macaques over the  
308 course of five weeks (Supplemental Figure 1). Abnormal cycling was observed for infected  
309 subjects (K. Mulka, et al, manuscript in preparation). By nanoparticle tracking analysis, CVL EV  
310 concentration increased during ovulation (Figure 1A). Transmission electron microscopy was  
311 performed for representative fractions of CVL, revealing bacteria and associated particles in the  
312 1,000 × g pellet (Figure 1B). The 100,000 x g pellet included apparent EVs up to 200 nm in  
313 diameter (Figure 1C). EV markers (shown: CD63 and CD81) were confirmed by Western blot in  
314 samples from control and infected subjects (Figure 1D). Calnexin was found only in tissue  
315 samples (Figure 1E). Interestingly, neither TSG101 nor syntenin (considered to be luminal EV  
316 proteins) could be detected in the EV-enriched fractions of CVL (Figure 1E), potentially  
317 indicating a predominance of surface-released EVs over endosomal-origin exosomes in these  
318 preparations.

319

320 **Extracellular miRNAs of the cervicovaginal compartment**

321 Based upon preliminary findings from a study of human CVL (Hancock and Witwer,  
322 unpublished data), we designed a custom TaqMan low-density array (TLDA) to measure 47  
323 miRNAs expected to be present in CVL, along with the snRNA U6. CVL from all subjects and  
324 at all time points was fractionated by stepped centrifugation to yield a 10,000 x g pellet (10K  
325 pellet or p10), a 100,000 x g pellet (UC pellet or p100), and 100,000 x g supernatant (UC



326 supernatant or S100). Total RNA from all fractions was profiled by TLDA. Raw (Figure 2A),  
327 quantile normalized (Figure 2B), and geometric mean-adjusted Cq values (Figure 2C) were  
328 subjected to unsupervised hierarchical clustering. This clustering did not reveal broad miRNA  
329 profile differences associated with sample collection time, menstruation, or SIV infection.

330

### 331 **Distribution of miRNAs across CVL fractions**

332 Across the three examined CVL fractions (p10, p100, S100), the ten most abundant miRNAs  
333 (lowest Cq values) were miRs-223-3p, -203a-3p, -24-3p, -150-5p, -146a-5p, -21-5p, -222-3p, -  
334 92a-3p, -17-5p, and -16-5p. The average normalized Cq value for each miRNA was greater (i.e.,  
335 lower abundance) in the p100 than in the S100 fraction (Figure 3A and inset), and indeed in p10  
336 and p100 combined (Figure 3B), suggesting that most miRNA in CVL, as in various body fluids,  
337 is found outside the EV-enriched fractions. Considering all fractions, the differences between the  
338 EV-enriched and EV-depleted fractions were significant even after Bonferroni correction for all  
339 features except U6, miR-191-5p, and miR-451a-5p. On average, the S100 fraction contained  
340 86.5% of the total miRNA from these three fractions. In the p10 fraction, the average miRNA  
341 was detected at 10.5% its level in the S100 fraction (SD=5.7%). miR-34a-5p had the lowest  
342 (5.9%) and miR-28-3p the highest (33.7%) abundance compared with S100. In the p100 fraction,  
343 miRNAs were on average 5.6% (SD=2.4%) as abundant as in S100. The least represented in  
344 p100 was miR-27a-3p (2.3%), and the best represented was again miR-28-3p (13.4%). miRNA  
345 rank was significantly correlated across fractions, despite minor differences in order (Figure 3C).

346

### 347 **qPCR validation**

348 Individual stem loop RT/hydrolysis probe qPCR assays were used to verify TLDA results for  
349 miRs-19a-3p, -186-5p, -451a-5p, -200c-3p, -222-3p, -193b-3p, -181a-5p, and -125b-5p. miR-  
350 375-3p (not included on the array), was also measured because of a reported association with  
351 goblet cells (12). Results of qPCR assays, adjusted by miR-16-5p for each sample, are shown in  
352 Figure 4A. Figure 4B compares miRNA ranks (1-11) by TLDA and individual qPCR, which are  
353 generally in concordance. Note that expression of red blood cell miRNA miR-451a-5p was low,  
354 suggesting minimal contamination from blood for most samples.

355

### 356 **miRNAs and retroviral infection status**

357 An association of miRNA abundance with infection status could yield novel biomarkers as well  
358 as clues to roles of miRNA in modulating infection. However, the small number of subjects in  
359 our study was a challenge. Nevertheless, by considering all subjects and time points together for  
360 both infected and uninfected subjects, microarray data suggested a slightly reduced abundance of  
361 miRs-186-5p, -222-3p, and -200c-3p in infected samples, while qPCR revealed differential  
362 abundance of miRs-186-5p, -375-3p, and -125b-5p. (Figure 5). miR-186-5p was thus identified  
363 by both techniques as potentially associated with retroviral infection.

364

365 **miR-186-5p inhibits HIV p24 release by monocyte-derived macrophages.** To assess a  
366 possible influence of miR-186-5p (“miR-186”) on retroviral replication, we introduced miR-186  
367 mimic or control RNAs into monocyte-derived macrophages 24 hours before infection or not  
368 with HIV. At days 3, 6, and 9 post-infection (dpi), we measured HIV release (capsid p24 protein  
369 in culture supernatant) and transcription (cellular Gag mRNA copy number). By p24 release,

370 robust infection was observed by 3 dpi, and p24 counts increased by two-fold or more by 9 dpi  
371 (Figure 6A) for multiple replicate experiments with cells from three donors. Compared with  
372 infected, untreated controls, mock-transfected cells (not shown), and cells transfected with a  
373 negative control RNA (labeled with a fluorophore to assess transfection efficiency), miR-186  
374 transfection was associated with a significant decline of released p24 at all time points (ANOVA  
375 with Bonferroni correction) (Figure 6B-D). The negative control condition showed a suppressive  
376 trend that reached nominal significance at 9 dpi. However, miR-186-associated suppression was  
377 significantly greater at all time points.

378

#### 379 **No consistent effect of miR-186 on HIV RNA abundance**

380 Using a gag qPCR/standard curve, we quantitated full-length HIV-1 transcript in cells from three  
381 donors. In cells from only one of three donors were fewer HIV-1 copies associated with miR-186  
382 mimic transfection (Figure 7). Overall, there was no statistically significant difference in HIV  
383 RNA between the conditions.

384

385

## 386 **DISCUSSION**

387 Cervicovaginal lavage and CVL EVs and exRNPs, like EVs in the uterus [41, 42], may offer  
388 information about the health of the reproductive tract as well as clues about factors that facilitate  
389 or block transmission of infectious agents. Proteomic analyses of human [43] and rhesus  
390 macaque [44] CVL have suggested a core proteome and a highly variable proteome that responds  
391 to changes in pregnancy status, menstruation, infection, and other stressors. However, exRNA  
392 and extracellular vesicle profiles are less understood in this compartment. Thus, the major  
393 finding of this study is further characterization of CVL fluid of primates, including extracellular  
394 vesicle and miRNA profiles. EVs could be liberated from vaginal secretions by lavage, and these  
395 EVs could be concentrated using a standard stepped centrifugation procedure, with enrichment  
396 of positive (membrane-associated) markers and apparent absence of a cellular negative control.  
397 Furthermore, both EV-replete and EV-depleted fractions of CVL contained abundant miRNA.  
398 As reported for other biological fluids [27, 45], miRNA concentration was highest in the EV-  
399 depleted CVL fractions, not in EV-enriched ultracentrifuged pellets, consistent with packaging  
400 of most extracellular miRNA into exRNPs; the function, if any, of extracellular miRNAs in the  
401 cervicovaginal tract of healthy individuals remains to be determined. We observed minimal  
402 differences in extracellular miRNA profiles between SIV-infected and uninfected subjects or,  
403 most surprisingly, during the course of the menstrual cycle, suggesting a certain stability of  
404 extracellular miRNA in the compartment. Correlation of miRNA concentrations in EV-depleted  
405 and -replete fractions was also apparent. Based on relative abundance, miRNAs in EVs and  
406 exRNPs of CVL are likely derived from epithelial cells (including goblet cells), and cells of the  
407 immune system (as suggested, e.g., by myeloid-enriched miR-223 and lymphocyte-enriched  
408 miR-150) [46]. Of the most abundant miRNAs we identified, many have been ascribed tumor-

409 suppressive roles in various types of cancer (14–19). Also, miR-223 and miR-150 have been  
410 described as “anti-HIV” miRNAs [53] among a variety of reported antiretroviral sRNAs, both  
411 host and viral [54–59]. Given their relative abundance in the vaginal tract, a common site for  
412 HIV infection, these miRNAs may contribute to antiviral defenses.

413 Along these lines, a second major finding of this study is a possible role for miR-186 in anti-  
414 retroviral defense. In contrast with an early report of direct binding of host miRNAs to retroviral  
415 transcripts and subsequent suppression [53], it now appears that this mechanism of suppression is  
416 relatively uncommon [60], and that anti-HIV miRNAs may exert effects through control of host  
417 genes instead [e.g., [61]]. Our data also support the conclusion that reduction of HIV RNA levels  
418 is not the main mechanism for miR-186-mediated suppression of HIV release.

419 We would like to emphasize several weaknesses of the study and opportunity for future research:

420 1) We used stepped ultracentrifugation without density gradients because of the small sample  
421 volumes available. Although stepped ultracentrifugation remains a widely used method for EV  
422 enrichment [33, 62], subsequent gradients or alternative isolation methods could be attempted  
423 with larger volume samples to increase purity in future. Possibly, our study overestimates the  
424 abundance of miRNAs in CVL EVs, and differential packaging into EVs and exRNPs is masked  
425 by contamination of our EV preps with exRNPs.

426 2) Our qPCR array approach and focus on miRNAs leaves room for additional work. While we  
427 are confident that our array captured most of the abundant miRNAs in CVL, sequencing short  
428 and longer RNAs could reveal additional markers.

429 3) The small number of subjects and the absence of obvious menstrual cycle in infected subjects  
430 precludes strong conclusions about EV or miRNA associations with either infection or the

431 menstrual cycle. For example, we did not observe the expected increase in miR-451a or other red  
432 blood cell-specific miRNAs during menstruation. However, since only two animals showed  
433 evidence of cycling, experiments with more subjects and larger sample volumes are needed.

434 4) Our previous criticisms of miRNA functional studies [63] also apply to our work here.  
435 Additional work is needed to prove that miR-186 can regulate retroviral release at endogenous  
436 levels, that it is present in active RNPs [64], its interactions with host targets, and a mechanism  
437 for viral suppression. Finally, it is possible, but must be demonstrated, that miR-186 acts in a  
438 paracrine fashion via EV or exRNP shuttles.

439 5) We have investigated the effects of miR-186 only in monocyte-derived macrophages. We  
440 chose to begin with this cell type because of the abundance of miR-223 and the known role of  
441 macrophages in the epithelium. Other cell types should also be investigated.

442 Overall, the results presented here support further development of CVL and its constituents as a  
443 window into the health of the cervicovaginal compartment.

444

445

446

447

448 **ACKNOWLEDGMENTS**

449 The authors thank Robert Adams, Lauren Ostrenga, and Sarah Beck for contributions to these  
450 studies. The authors gratefully acknowledge the Oregon National Primate Research Center and  
451 David Erikson for hormone analyses and endocrinology advice and thank Barbara Smith of the  
452 JHU IBBS Microscope Facility for expert assistance with electron microscopy. Amanda Steele  
453 provided paid assistance with editing and organizing an early version of the manuscript.

454

## 455 **AUTHOR CONTRIBUTIONS**

456 All authors have accepted responsibility for the entire content of this submitted manuscript and  
457 approved submission. ZZ and DM performed experiments and analyses and contributed to  
458 writing the paper; KM and DM collected and processed samples; KAMP provided clinical  
459 assistance; ZL, BHP, and GVH performed experiments; KWW planned and directed the studies,  
460 conducted analyses, and wrote and edited the manuscript.

461

## 462 **FUNDING**

463 This work was supported in part by the US National Institutes of Health through R01 DA040385  
464 (to KWW); by the Johns Hopkins University Center for AIDS Research, an NIH funded program  
465 (P30AI094189; pilot grant to KWW and summer research fellowship to ZZ); and by the National  
466 Center for Research Resources and the Office of Research Infrastructure Programs (ORIP) and  
467 the National Institutes of Health (P40 OD013117). DM and KM received support through NIH  
468 T32 OD011089.

469

## 470 **COMPETING INTERESTS**

471 The authors have no competing interests to declare. The funding organization(s) played no role  
472 in the study design; in the collection, analysis, and interpretation of the data; in the writing of the  
473 report; or in the decision to submit the report for publication.



474 **REFERENCES**

- 475 1. Hanson EK, Ballantyne J (2013) Highly specific mRNA biomarkers for the identification  
476 of vaginal secretions in sexual assault investigations. *Sci Justice* 53:14–22. doi:  
477 10.1016/j.scijus.2012.03.007
- 478 2. Jakubowska J, MacIejewska A, Pawłowski R, Bielawski KP (2013) MRNA profiling for  
479 vaginal fluid and menstrual blood identification. *Forensic Sci Int Genet* 7:272–278. doi:  
480 10.1016/j.fsigen.2012.11.005
- 481 3. Park JL, Kwon OH, Kim JH, et al (2014) Identification of body fluid-specific DNA  
482 methylation markers for use in forensic science. *Forensic Sci Int Genet* 13:147–153. doi:  
483 10.1016/j.fsigen.2014.07.011
- 484 4. Hanson EK, Lubenow H, Ballantyne J (2009) Identification of forensically relevant body  
485 fluids using a panel of differentially expressed microRNAs. *Anal Biochem* 387:303–314.  
486 doi: 10.1016/j.ab.2009.01.037S0003-2697(09)00065-7 [pii]
- 487 5. Liu J, Sun H, Wang X, et al (2014) Increased Exosomal MicroRNA-21 and MicroRNA-  
488 146a Levels in the Cervicovaginal Lavage Specimens of Patients with Cervical Cancer.  
489 *Int J Mol Sci Int J Mol Sci* 15:758–773. doi: 10.3390/ijms15010758
- 490 6. Gravett MG, Thomas A, Schneider KA, et al (2007) Proteomic Analysis of  
491 Cervical–Vaginal Fluid: Identification of Novel Biomarkers for Detection of Intra-  
492 amniotic Infection. *J Proteome Res* 6:89–96. doi: 10.1021/pr060149v
- 493 7. Burgener A, Boutilier J, Wachihi C, et al (2008) Identification of differentially expressed  
494 proteins in the cervical mucosa of HIV-1-resistant sex workers. *J Proteome Res* 7:4446–

- 495 4454. doi: 10.1021/pr800406r
- 496 8. Zevin AS, Xie IY, Birse K, et al (2016) Microbiome Composition and Function Drives  
497 Wound-Healing Impairment in the Female Genital Tract. *PLoS Pathog* 12:e1005889. doi:  
498 10.1371/journal.ppat.1005889
- 499 9. Boggiano C, Littman DR (2007) HIV's Vagina Travelogue. *Immunity* 26:145–147. doi:  
500 10.1016/j.immuni.2007.02.001
- 501 10. Patel M V., Ghosh M, Fahey J V., et al (2014) Innate Immunity in the Vagina (Part II):  
502 Anti-HIV Activity and Antiviral Content of Human Vaginal Secretions. *Am J Reprod*  
503 *Immunol* 72:22–33. doi: 10.1111/aji.12218
- 504 11. Benki S, Mostad SB, Richardson BA, et al (2008) Increased levels of HIV-1-infected cells  
505 in endocervical secretions after the luteinizing hormone surge. *J Acquir Immune Defic*  
506 *Syndr* 47:529–34. doi: 10.1097/QAI.0b013e318165b952
- 507 12. Zara F, Nappi RE, Brerra R, et al (2004) Markers of local immunity in cervico-vaginal  
508 secretions of HIV infected women: implications for HIV shedding. *Sex Transm Infect*  
509 80:108–112. doi: 10.1136/sti.2003.005157
- 510 13. Gardella B, Roccio M, Maccabruni A, et al (2011) HIV shedding in cervico-vaginal  
511 secretions in pregnant women. *Curr HIV Res* 9:313–20. doi: Abs: CHIVR-162 [pii]
- 512 14. Seaton KE, Ballweber L, Lan A, et al (2014) HIV-1 specific IgA detected in vaginal  
513 secretions of HIV uninfected women participating in a microbicide trial in Southern  
514 Africa are primarily directed toward gp120 and gp140 specificities. *PLoS One*. doi:  
515 10.1371/journal.pone.0101863

- 516 15. Ghosh M, Fahey J V., Shen Z, et al (2010) Anti-HIV activity in cervical-vaginal  
517 secretions from HIV-Positive and -Negative women correlate with innate antimicrobial  
518 levels and IgG antibodies. PLoS One. doi: 10.1371/journal.pone.0011366
- 519 16. Clemetson DB, Moss GB, Willerford DM, et al (1993) Detection of HIV DNA in cervical  
520 and vaginal secretions. Prevalence and correlates among women in Nairobi, Kenya. *Jama*  
521 269:2860–2864. doi: 10.1016/0020-7292(94)90090-6
- 522 17. Rahman S, Rabbani R, Wachihi C, et al (2013) Mucosal serpin A1 and A3 levels in HIV  
523 highly exposed sero-negative women are affected by the menstrual cycle and hormonal  
524 contraceptives but are independent of epidemiological confounders. *Am J Reprod*  
525 *Immunol* 69:64–72. doi: 10.1111/aji.12014
- 526 18. Yáñez-Mó M, Siljander PR-M, Andreu Z, et al (2015) Biological properties of  
527 extracellular vesicles and their physiological functions. *J Extracell vesicles* 4:27066.
- 528 19. Gould SJ, Raposo G (2013) As we wait: coping with an imperfect nomenclature for  
529 extracellular vesicles. *J Extracell Vesicles*. doi: 10.3402/jev.v2i0.2038920389 [pii]
- 530 20. Meehan B, Rak J, Di Vizio D (2016) Oncosomes - large and small: what are they, where  
531 they came from? *J Extracell vesicles* 5:33109.
- 532 21. György B, Hung ME, Breakefield XO, Leonard JN (2015) Therapeutic applications of  
533 extracellular vesicles: clinical promise and open questions. *Annu Rev Pharmacol Toxicol*  
534 55:439–64. doi: 10.1146/annurev-pharmtox-010814-124630
- 535 22. Witwer KW, Buzás EI, Bemis LT, et al (2013) Standardization of sample collection,  
536 isolation and analysis methods in extracellular vesicle research. *J Extracell vesicles* 2:1–25.

- 537 doi: 10.3402/jev.v2i0.20360
- 538 23. Smith JA, Daniel R (2016) Human vaginal fluid contains exosomes that have an inhibitory  
539 effect on an early step of the HIV-1 life cycle. *AIDS*. doi:  
540 10.1097/QAD.0000000000001236
- 541 24. Muth DC, McAlexander MA, Ostrenga LJ, et al (2015) Potential role of cervicovaginal  
542 extracellular particles in diagnosis of endometriosis. *BMC Vet Res* 11:187. doi:  
543 10.1186/s12917-015-0513-7
- 544 25. Sergeeva AM, Pinzon Restrepo N, Seitz H (2013) Quantitative aspects of RNA silencing  
545 in metazoans. *Biochem* 78:613–626. doi: 10.1134/S0006297913060072BCM78060795  
546 [pii]
- 547 26. Bartel DP (2009) MicroRNAs: target recognition and regulatory functions. *Cell* 136:215–  
548 233. doi: S0092-8674(09)00008-7 [pii]10.1016/j.cell.2009.01.002
- 549 27. Turchinovich A, Weiz L, Langheinz A, Burwinkel B (2011) Characterization of  
550 extracellular circulating microRNA. *Nucleic Acids Res* 39:7223–7233. doi: gkr254  
551 [pii]10.1093/nar/gkr254
- 552 28. Arroyo JD, Chevillet JR, Kroh EM, et al (2011) Argonaute2 complexes carry a population  
553 of circulating microRNAs independent of vesicles in human plasma. *Proc Natl Acad Sci U*  
554 *S A* 108:5003–5008. doi: 1019055108 [pii]10.1073/pnas.1019055108
- 555 29. Witwer KW, Sarbanes SL, Liu J, Clements JE (2011) A plasma microRNA signature of  
556 acute lentiviral infection: biomarkers of CNS disease. *AIDS* 204:1104–1114. doi:  
557 10.1097/QAD.0b013e32834b95bf

- 558 30. Zubakov D, Boersma AW, Choi Y, et al (2010) MicroRNA markers for forensic body  
559 fluid identification obtained from microarray screening and quantitative RT-PCR  
560 confirmation. *Int J Leg Med* 124:217–226. doi: 10.1007/s00414-009-0402-3
- 561 31. Seashols-Williams S, Lewis C, Calloway C, et al (2016) High-throughput miRNA  
562 sequencing and identification of biomarkers for forensically relevant biological fluids.  
563 *Electrophoresis*. doi: 10.1002/elps.201600258
- 564 32. Muth DC, McAlexander MA, Ostrenga LJ, et al (2015) Potential role of cervicovaginal  
565 extracellular particles in diagnosis of endometriosis. *Bmc Vet Res*. doi: 10.1186/s12917-  
566 015-0513-7
- 567 33. They C, Amigorena S, Raposo G, Clayton A (2006) Isolation and characterization of  
568 exosomes from cell culture supernatants and biological fluids. *Curr Protoc Cell Biol*  
569 Chapter 3:Unit 3 22. doi: 10.1002/0471143030.cb0322s30
- 570 34. McAlexander MA, Phillips MJ, Witwer KW (2013) Comparison of methods for miRNA  
571 extraction from plasma and quantitative recovery of RNA from cerebrospinal fluid. *Front*  
572 *Genet* 4:83. doi: 10.3389/fgene.2013.00083
- 573 35. Chen C, Ridzon DA, Broomer AJ, et al (2005) Real-time quantification of microRNAs by  
574 stem-loop RT-PCR. *Nucleic Acids Res* 33:e179. doi: 10.1093/nar/gni178
- 575 36. Witwer KW, Sarbanes SL, Liu J, Clements JE (2011) A plasma microRNA signature of  
576 acute lentiviral infection: biomarkers of central nervous system disease. *AIDS* 25:2057–  
577 2067. doi: 10.1097/QAD.0b013e32834b95bf
- 578 37. Clough E, Barrett T (2016) The Gene Expression Omnibus Database. *Methods Mol Biol*

- 579 1418:93–110. doi: 10.1007/978-1-4939-3578-9\_5
- 580 38. Lotvall J, Hill AF, Hochberg F, et al (2014) Minimal experimental requirements for  
581 definition of extracellular vesicles and their functions: a position statement from the  
582 International Society for Extracellular Vesicles. *J Extracell Vesicles* 3:26913. doi:  
583 10.3402/jev.v3.26913
- 584 39. Witwer KW, Soekmadji C, Hill AF, et al (2017) Updating the MISEV minimal  
585 requirements for extracellular vesicle studies: building bridges to reproducibility. *J*  
586 *Extracell Vesicles*. doi: 10.1080/20013078.2017.1396823
- 587 40. Van Deun J, Mestdagh P, Agostinis P, et al (2017) EV-TRACK: transparent reporting and  
588 centralizing knowledge in extracellular vesicle research. *Nat Methods* 14:228–232. doi:  
589 10.1038/nmeth.4185
- 590 41. Nguyen HPT, Simpson RJ, Salamonsen LA, Greening DW (2016) Extracellular Vesicles  
591 in the Intrauterine Environment: Challenges and Potential Functions. *Biol Reprod* 95:109–  
592 109. doi: 10.1095/biolreprod.116.143503
- 593 42. Campoy I, Lanau L, Altadill T, et al (2016) Exosome-like vesicles in uterine aspirates: a  
594 comparison of ultracentrifugation-based isolation protocols. *J Transl Med* 14:180. doi:  
595 10.1186/s12967-016-0935-4
- 596 43. Zegels G, Aa G, Raemdonck V, et al (2009) Comprehensive proteomic analysis of human  
597 cervical-vaginal fluid using colposcopy samples. *Proteome Sci*. doi: 10.1186/1477-5956-  
598 7-17
- 599 44. Gravett MG, Thomas A, Schneider KA, et al PROTEOMIC ANALYSIS OF CERVICAL-

- 600 VAGINAL FLUID: IDENTIFICATION OF NOVEL BIOMARKERS FOR DETECTION  
601 OF INTRA-AMNIOTIC INFECTION. doi: 10.1021/pr060149v
- 602 45. Arroyo JD, Chevillet JR, Kroh EM, et al (2011) Argonaute2 complexes carry a population  
603 of circulating microRNAs independent of vesicles in human plasma. Proc Natl Acad Sci U  
604 S A 108:5003–8. doi: 10.1073/pnas.1019055108
- 605 46. Pritchard CC, Kroh E, Wood B, et al (2012) Blood cell origin of circulating microRNAs: a  
606 cautionary note for cancer biomarker studies. Cancer Prev Res 5:492–497. doi: 1940-  
607 6207.CAPR-11-0370 [pii]10.1158/1940-6207.CAPR-11-0370
- 608 47. Akhter A, Patel JL, Farooq F, et al De Novo Acute Myeloid Leukemia in Adults:  
609 Suppression of MicroRNA-223 is Independent of LMO2 Protein Expression BUT  
610 Associate With Adverse Cytogenetic Profile and Undifferentiated Blast Morphology.  
611 Appl Immunohistochem Mol Morphol 23:733–9. doi: 10.1097/PAI.0000000000000145
- 612 48. Tombak A, Ay OI, Erdal ME, et al (2015) MicroRNA Expression Analysis in Patients  
613 with Primary Myelofibrosis, Polycythemia vera and Essential Thrombocythemia. Indian J  
614 Hematol Blood Transfus 31:416–25. doi: 10.1007/s12288-014-0492-z
- 615 49. Giray BG, Emekdas G, Tezcan S, et al (2014) Profiles of serum microRNAs; miR-125b-  
616 5p and miR223-3p serve as novel biomarkers for HBV-positive hepatocellular carcinoma.  
617 Mol Biol Rep 41:4513–9. doi: 10.1007/s11033-014-3322-3
- 618 50. Bertoli G, Cava C, Castiglioni I (2015) MicroRNAs: New Biomarkers for Diagnosis,  
619 Prognosis, Therapy Prediction and Therapeutic Tools for Breast Cancer. Theranostics  
620 5:1122–43. doi: 10.7150/thno.11543

- 621 51. Wang S, Zhang R, Claret FX, Yang H (2014) Involvement of microRNA-24 and DNA  
622 methylation in resistance of nasopharyngeal carcinoma to ionizing radiation. *Mol Cancer*  
623 *Ther* 13:3163–74. doi: 10.1158/1535-7163.MCT-14-0317
- 624 52. Li J, Hu L, Tian C, et al (2015) microRNA-150 promotes cervical cancer cell growth and  
625 survival by targeting FOXO4. *BMC Mol Biol* 16:24. doi: 10.1186/s12867-015-0052-6
- 626 53. Huang J, Wang F, Argyris E, et al (2007) Cellular microRNAs contribute to HIV-1  
627 latency in resting primary CD4+ T lymphocytes. *Nat Med* 13:1241–1247. doi: nm1639  
628 [pii]10.1038/nm1639
- 629 54. Swaminathan S, Murray DD, Kelleher AD (2013) miRNAs and HIV: unforeseen  
630 determinants of host-pathogen interaction. *Immunol Rev* 254:265–280. doi:  
631 10.1111/imr.12077
- 632 55. Sisk JM, Witwer KW, Tarwater PM, Clements JE (2013) SIV replication is directly  
633 downregulated by four antiviral miRNAs. *Retrovirology* 10:95. doi: 1742-4690-10-95  
634 [pii]10.1186/1742-4690-10-95
- 635 56. Wang X, Ye L, Zhou Y, et al (2011) Inhibition of anti-HIV microRNA expression: a  
636 mechanism for opioid-mediated enhancement of HIV infection of monocytes. *Am J Pathol*  
637 178:41–47. doi: S0002-9440(10)00089-1 [pii]10.1016/j.ajpath.2010.11.042
- 638 57. Swaminathan S, Suzuki K, Seddiki N, et al (2012) Differential regulation of the Let-7  
639 family of microRNAs in CD4+ T cells alters IL-10 expression. *J Immunol* 188:6238–6246.  
640 doi: jimmunol.1101196 [pii]10.4049/jimmunol.1101196
- 641 58. Klase Z, Kale P, Winograd R, et al (2007) HIV-1 TAR element is processed by Dicer to



- 642 yield a viral micro-RNA involved in chromatin remodeling of the viral LTR. *BMC Mol*  
643 *Biol* 8:63. doi: 1471-2199-8-63 [pii]10.1186/1471-2199-8-63
- 644 59. Wagschal A, Rousset E, Basavarajaiah P, et al (2012) Microprocessor, Setx, Xrn2, and  
645 Rrp6 co-operate to induce premature termination of transcription by RNAPII. *Cell*  
646 150:1147–1157. doi: 10.1016/j.cell.2012.08.004S0092-8674(12)00999-3 [pii]
- 647 60. Whisnant AW, Bogerd HP, Flores O, et al (2013) In-Depth Analysis of the Interaction of  
648 HIV-1 with Cellular microRNA Biogenesis and Effector Mechanisms. *MBio*. doi:  
649 10.1128/mBio.00193-13e00193-13 [pii]mBio.00193-13 [pii]
- 650 61. Sung TL, Rice AP (2009) miR-198 inhibits HIV-1 gene expression and replication in  
651 monocytes and its mechanism of action appears to involve repression of cyclin T1. *PLoS*  
652 *Pathog* 5:e1000263. doi: 10.1371/journal.ppat.1000263
- 653 62. Gardiner C, Vizio D Di, Sahoo S, et al (2016) Techniques used for the isolation and  
654 characterization of extracellular vesicles: results of a worldwide survey. *J Extracell*  
655 *Vesicles*. doi: 10.3402/jev.v5.32945
- 656 63. Witwer KW, Halushka MK (2016) Towards the Promise of microRNAs - Enhancing  
657 reproducibility and rigor in microRNA research. *RNA Biol* 0. doi:  
658 10.1080/15476286.2016.1236172
- 659 64. La Rocca G, Olejniczak SH, Gonzalez AJ, et al (2015) In vivo, Argonaute-bound  
660 microRNAs exist predominantly in a reservoir of low molecular weight complexes not  
661 associated with mRNA. *Proc Natl Acad Sci U S A* 112:767–772. doi:  
662 10.1073/pnas.1424217112

663 **FIGURE LEGENDS**

664 **Figure 1. EVs are found in cervicovaginal lavage. A)** Particle concentrations of CVL 100,000  
665  $\times g$  ultracentrifuge (UC) pellets (blue) monitored weekly over five weeks for two SIV-negative  
666 (“control”) and four SIV-infected subjects. Red arrows indicate estimated ovulation for SIV-  
667 negative subjects. **B and C)** Transmission electron micrographs of CVL 10,000  $\times g$  pellet (**B**)  
668 and 100,000 $\times g$  pellet (**C**) confirm presence of bacteria and EVs (B) and EV-like particles (C).  
669 Western blot: enrichment of CD63 and CD81 markers (**D**) and absence of ER marker calnexin  
670 (**E**) in pooled 10,000 and 10,000  $\times g$  pellet fractions. Vaginal tissue homogenate and dendritic  
671 cell 100,000  $\times g$  pellet controls were also positive for CD63 and CD81. EV luminal markers  
672 syntenin and TSG101 were present in cellular but not putative EV samples.

673

674 **Figure 2. miRNA profile of CVL fractions.** Targeted miRNA profiles were determined by  
675 custom TaqMan low-density array (TLDA). Hierarchical clustering of samples and features  
676 (Pearson correlation, average linkage) of data: raw (**A**) or normalized by (**B**) quantiles or (**C**) a  
677 geometric mean approach as described in the methods. Abundance scale: red (high) to low (blue).

678

679 **Figure 3: Relative abundance of miRNAs in centrifuged CVL fractions. A)** Abundant  
680 miRNAs in descending order based on Cq values normalized to the geometric mean for each  
681 sample. Inset: average of all miRNAs in UC pellet and UC supernatant. Error bars: SEM. **B)**  
682 miRNAs in each fraction (10,000 $\times g$  pellet=p10, 110,000  $\times g$  pellet=p100, 110,000 $\times g$   
683 supernatant=S100) are significantly correlated ( $p < 0.0001$ , Spearman). **C)** miRNA expression in

684 EV-enriched fractions (p10, p100) as a percentage of total estimated expression  
685 (p10+p100+S100 by Cq) in ascending order, from miR-27a-3p (7.9%) to miR-28-3p (32.0%).

686

687 **Figure 4. miRNA qPCR validation. A)** Stem-loop reverse transcription/qPCR validation of UC  
688 p100 samples, all subjects and time points (individual dots). **B)** Ranks of abundant miRNAs  
689 based on qPCR and TLDA Cq data.

690

691 **Figure 5. miR-186-5p downregulation: SIV. A)** By TLDA, miRs-186, -222, and -200c were  
692 significantly less abundant in the CVL p100 fraction of infected subjects, \*\*  $p < 0.01$ , \*\*\*  
693  $p < 0.001$ . **B)** By qPCR, miRs-186, -375, and -125b were significantly less abundant, \*\*  
694  $p < 0.01$ , \*\*\*  $p < 0.001$ .

695

696 **Figure 6: miRNA-186-5p inhibits p24 release.** Monocyte-derived macrophages from human  
697 donors were infected with HIV-1 BaL. **A)** p24 production increased >2 fold for all donors from 3  
698 to 9 days post-infection (dpi), infected but otherwise untreated cells. **B-D)** Transfection of miR-  
699 186 mimic was associated with a decrease of p24 release compared with untransfected controls  
700 (NC) and control RNA mimic-transfected controls (RC); ns=not significant, \*  $p < 0.05$ , \*\*  $p < 0.01$ ,  
701 \*\*\*\*  $p < 0.0001$  (ANOVA followed by Bonferroni correction for multiple tests). Results were  
702 obtained from 8 to 11 replicate experiments with cells from 3 human donors.

703

704 **Figure 7: miRNA-186-5p mimic transfection inconsistently suppresses HIV-1 gag mRNA**  
705 **production.** Apparent downregulation of gag mRNA (qPCR assay with standard curve) was  
706 observed in miR-186-transfected monocyte-derived macrophages from only 1 of 3 donors  
707 compared with control RNA-transfected cells (RC). Overall, results were insignificant by t-test,  
708  $p > 0.1$ , with multiple replicates of cells from 3 human donors.

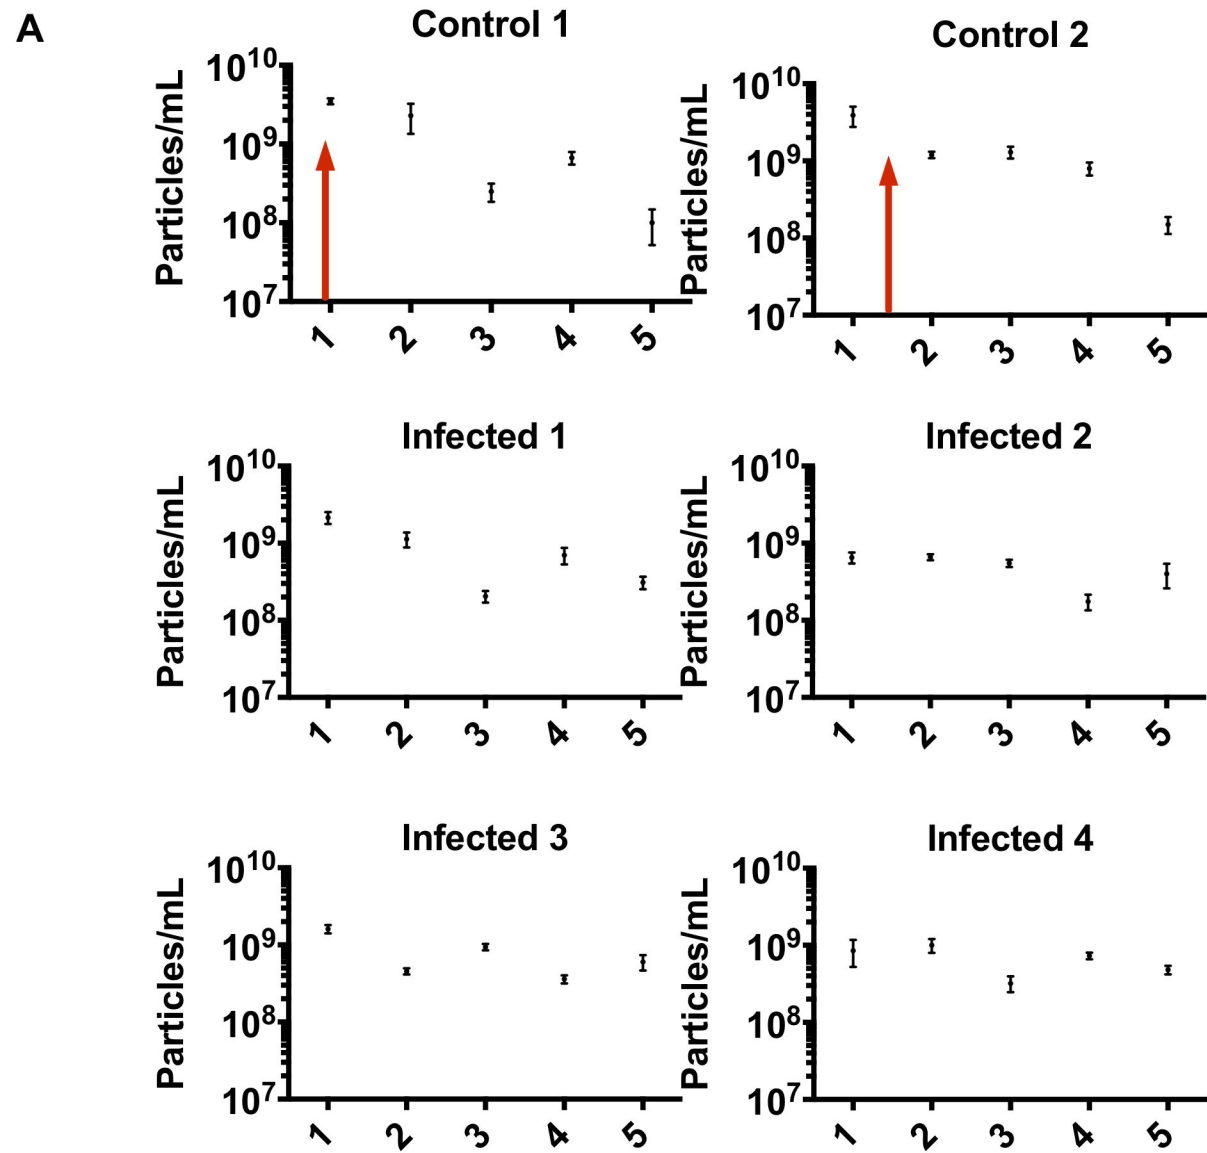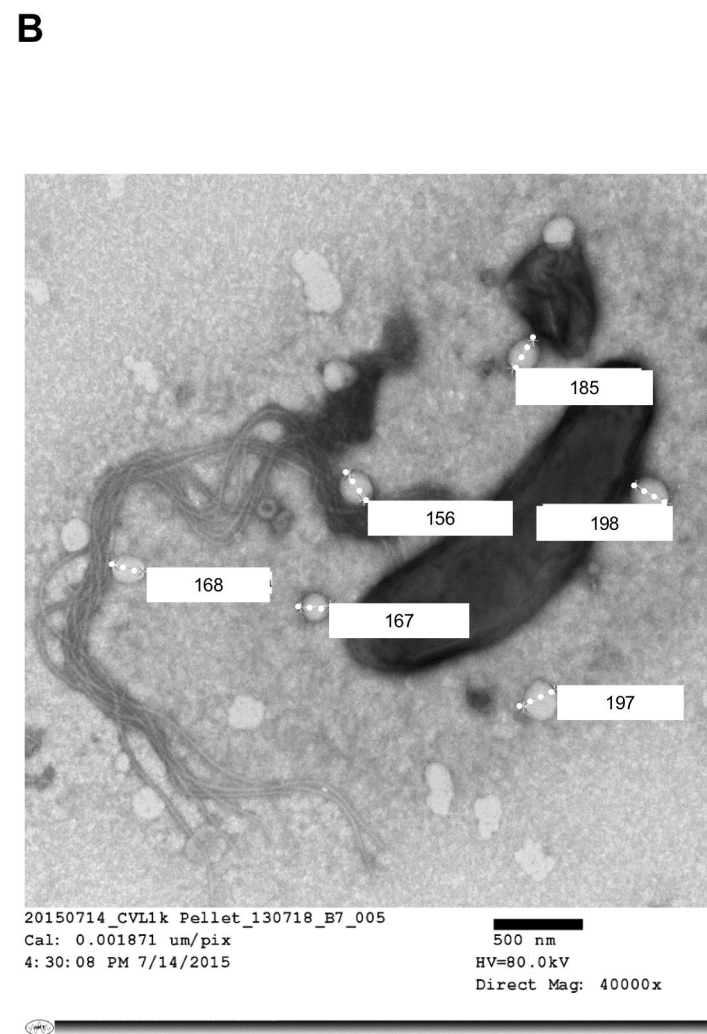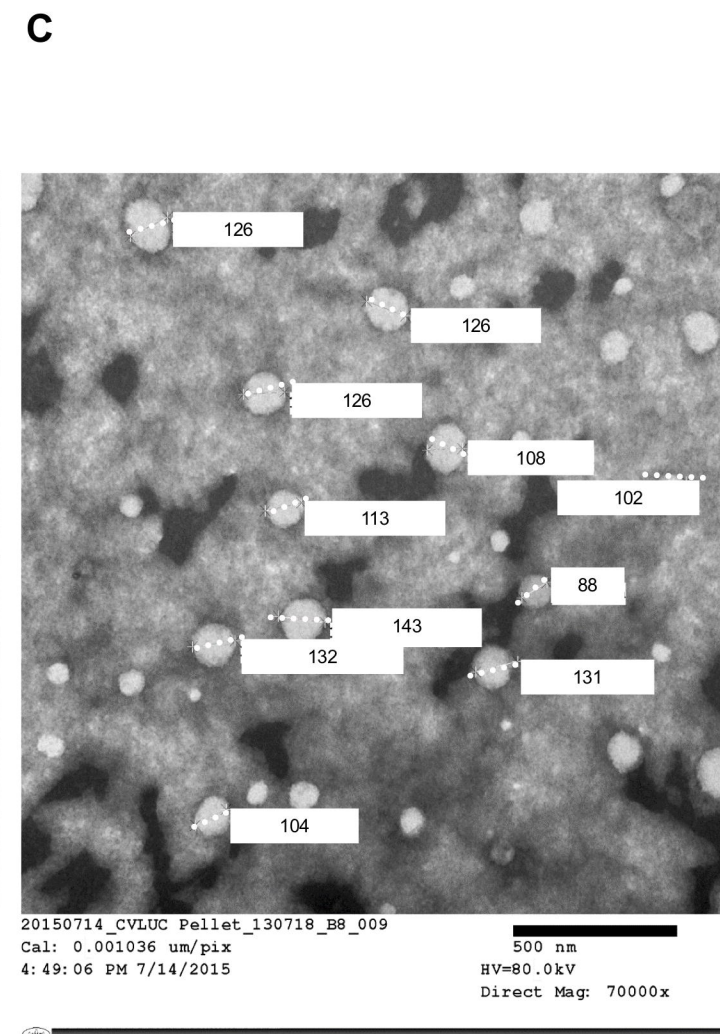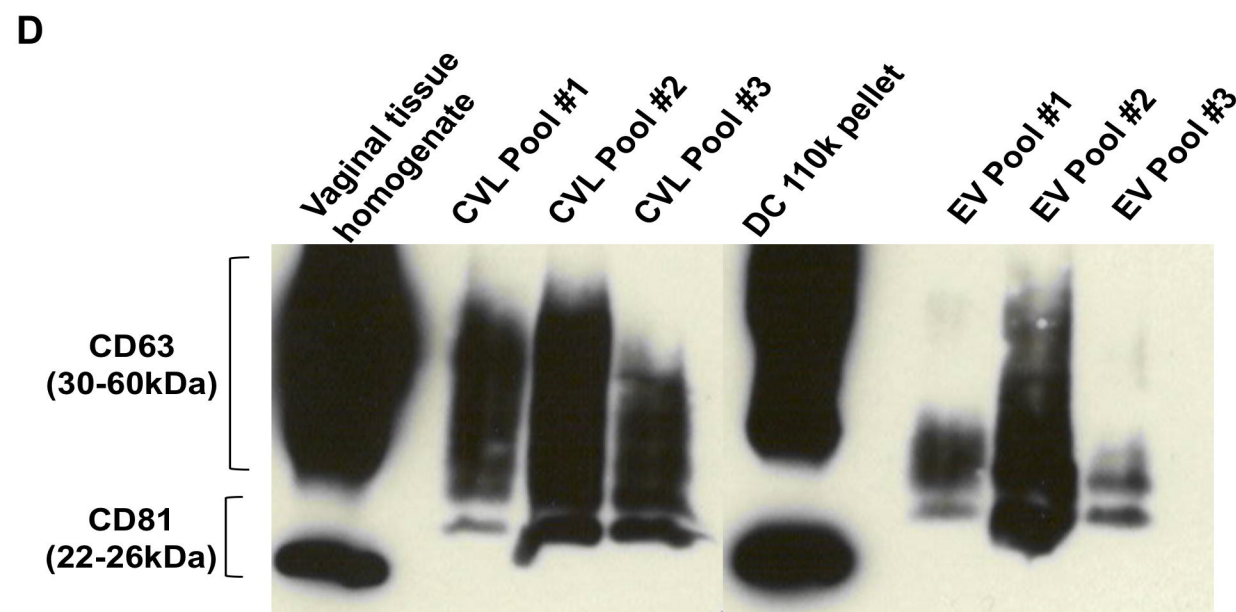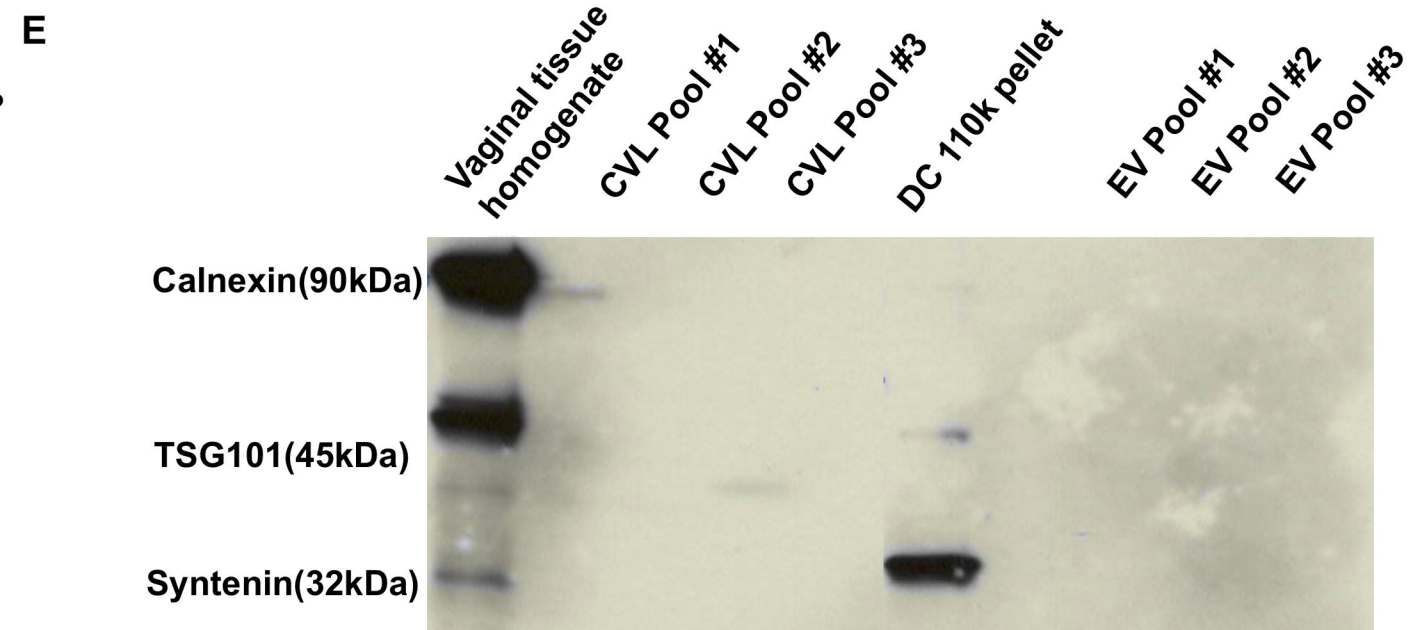

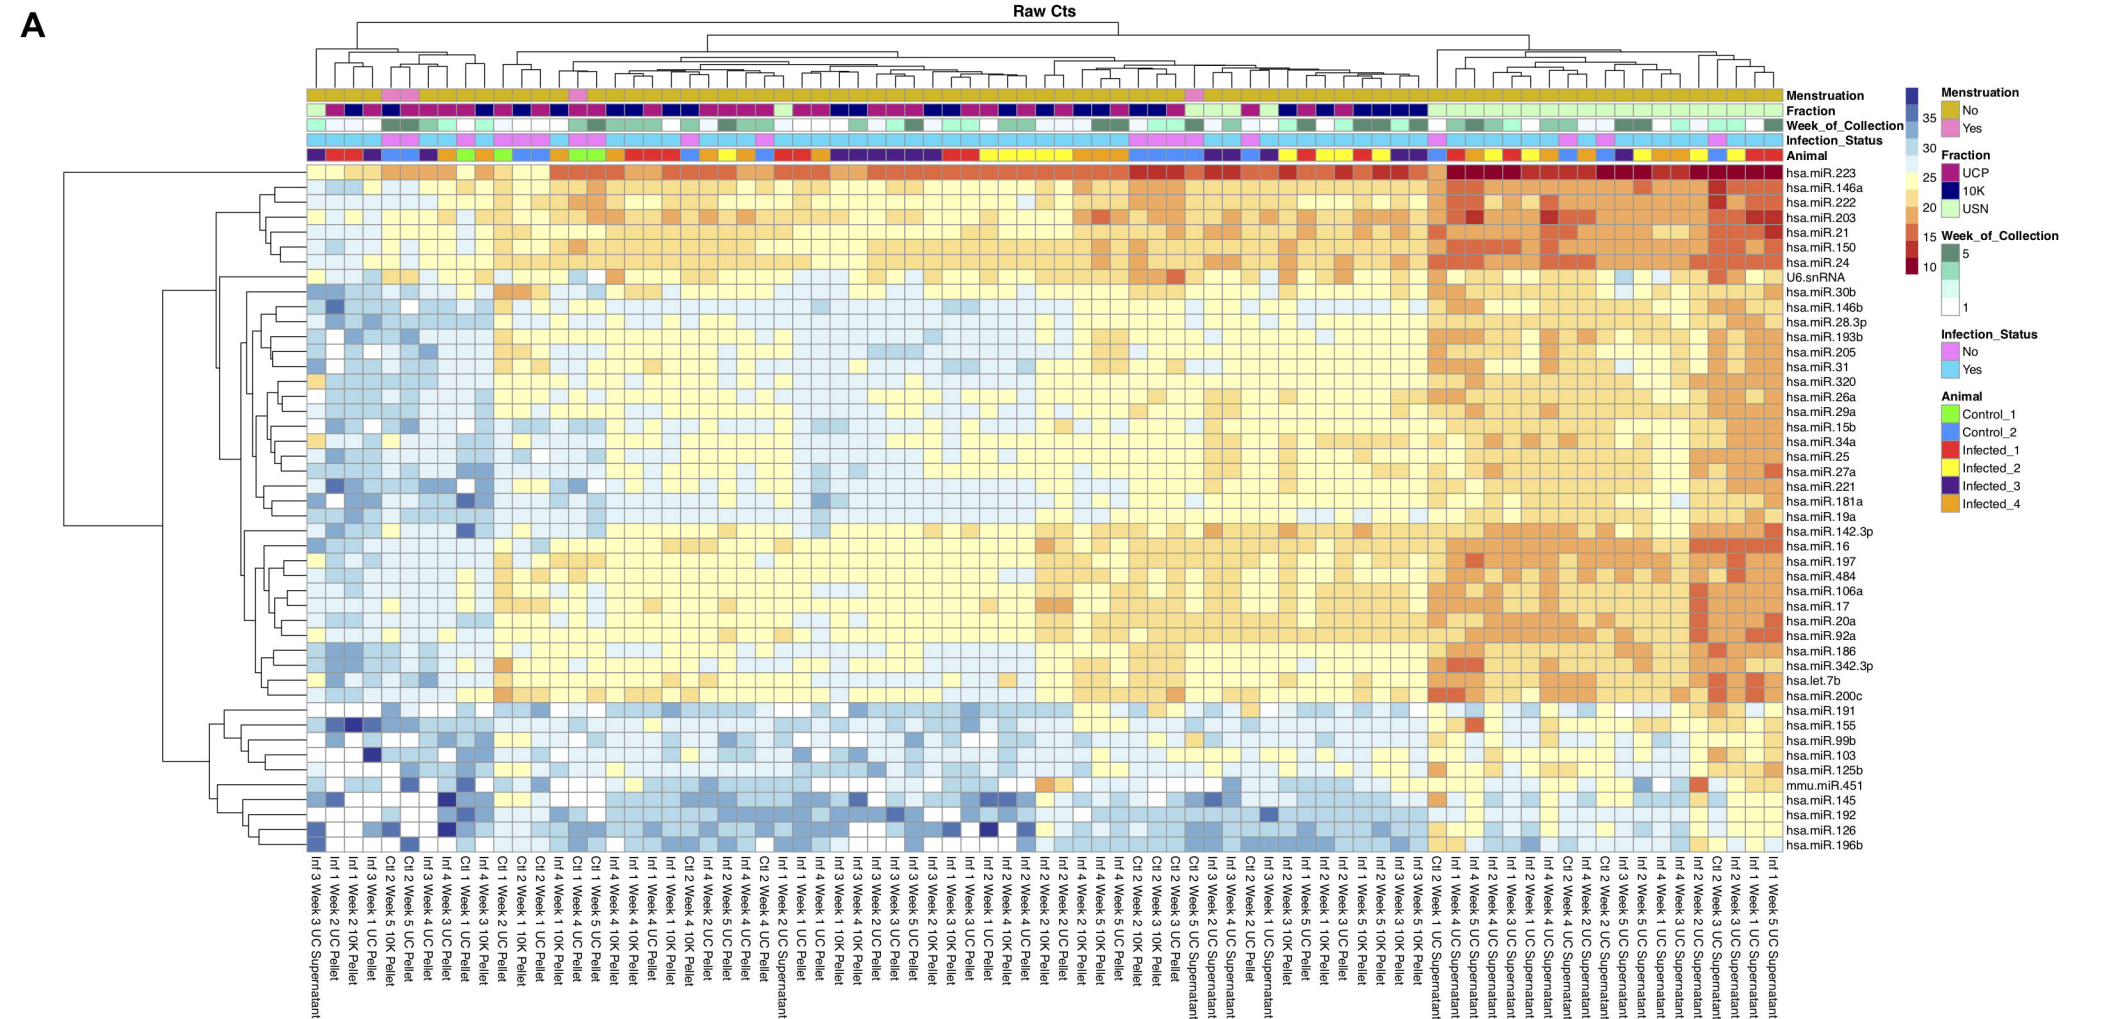

bioRxiv preprint doi: <https://doi.org/10.1101/263947>; this version posted February 11, 2018. The copyright holder for this preprint (which was not certified by peer review) is the author/funder, who has granted bioRxiv a license to display the preprint in perpetuity. It is made available under aCC-BY 4.0 International license.

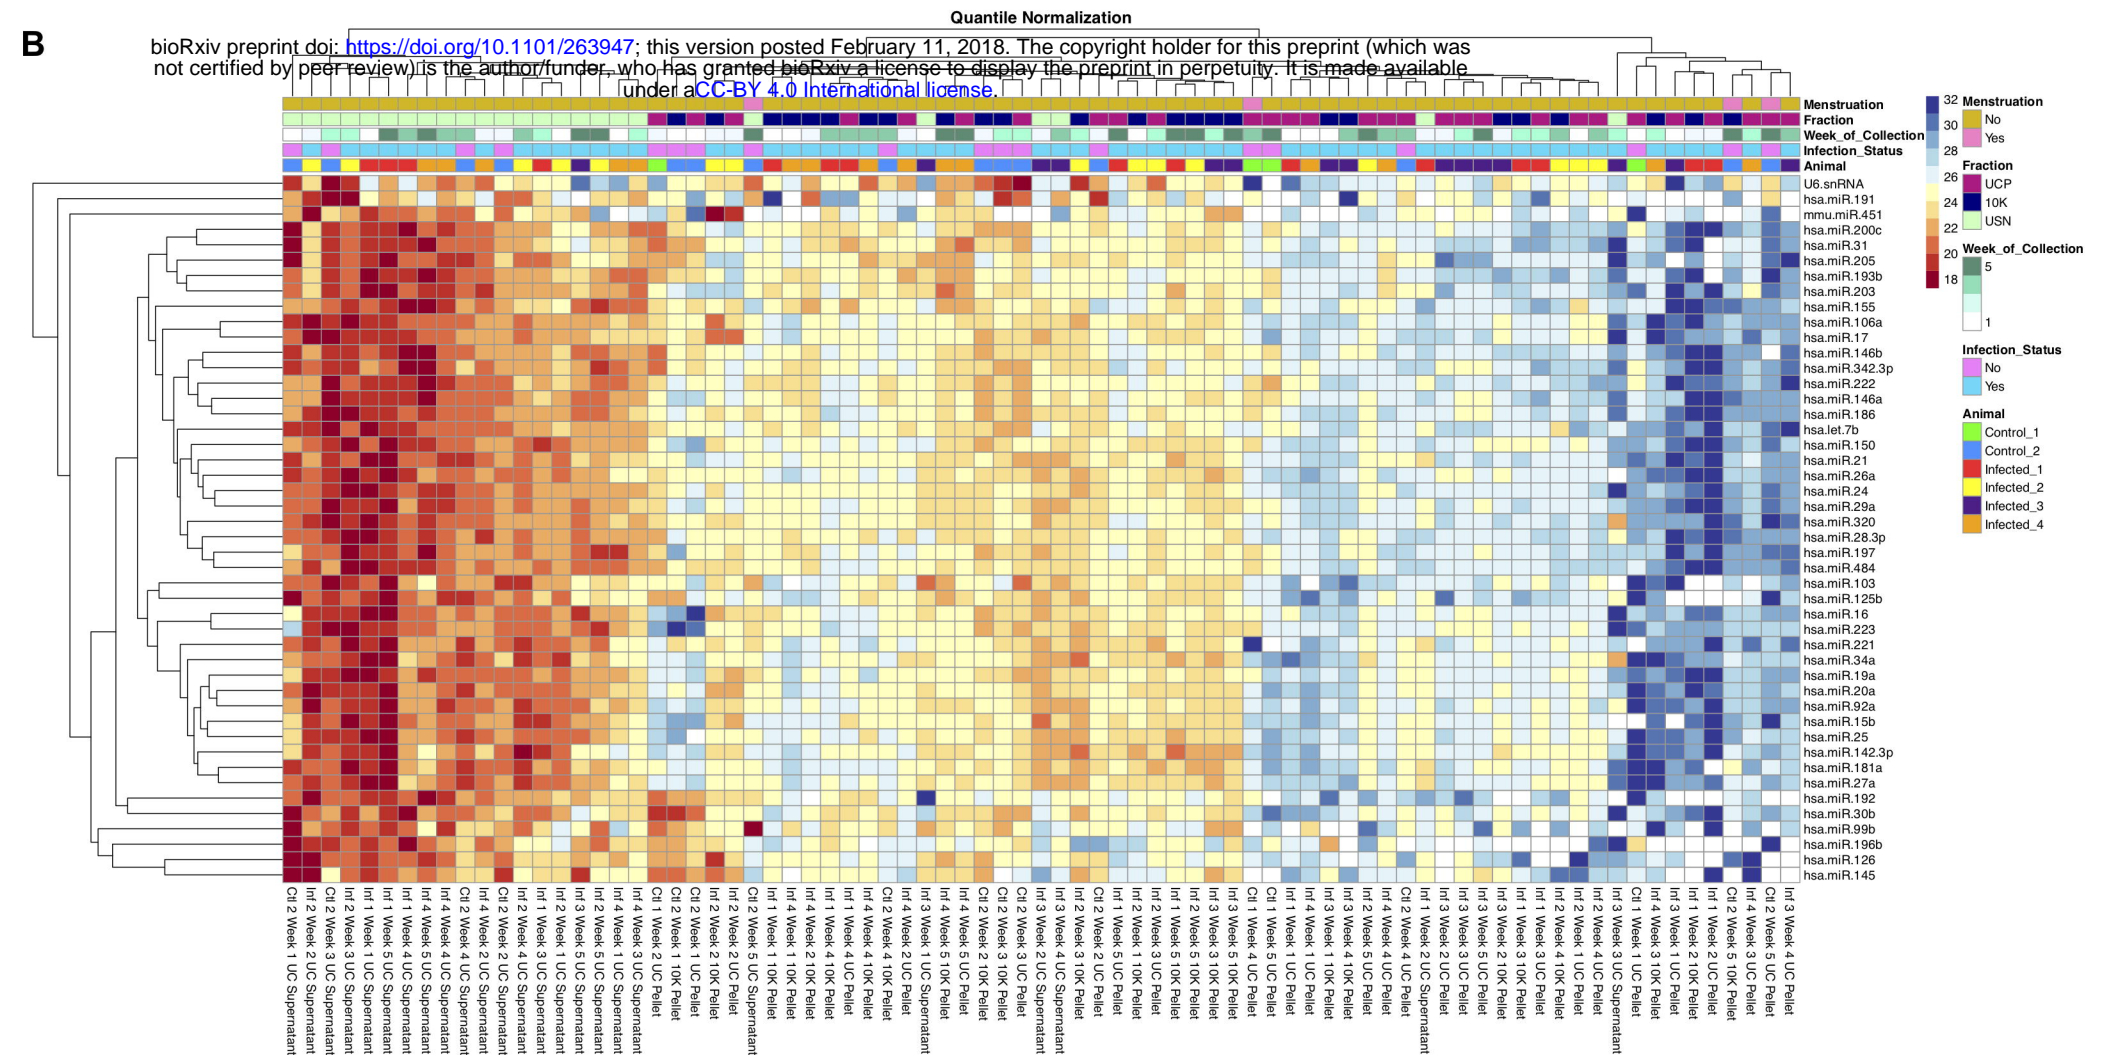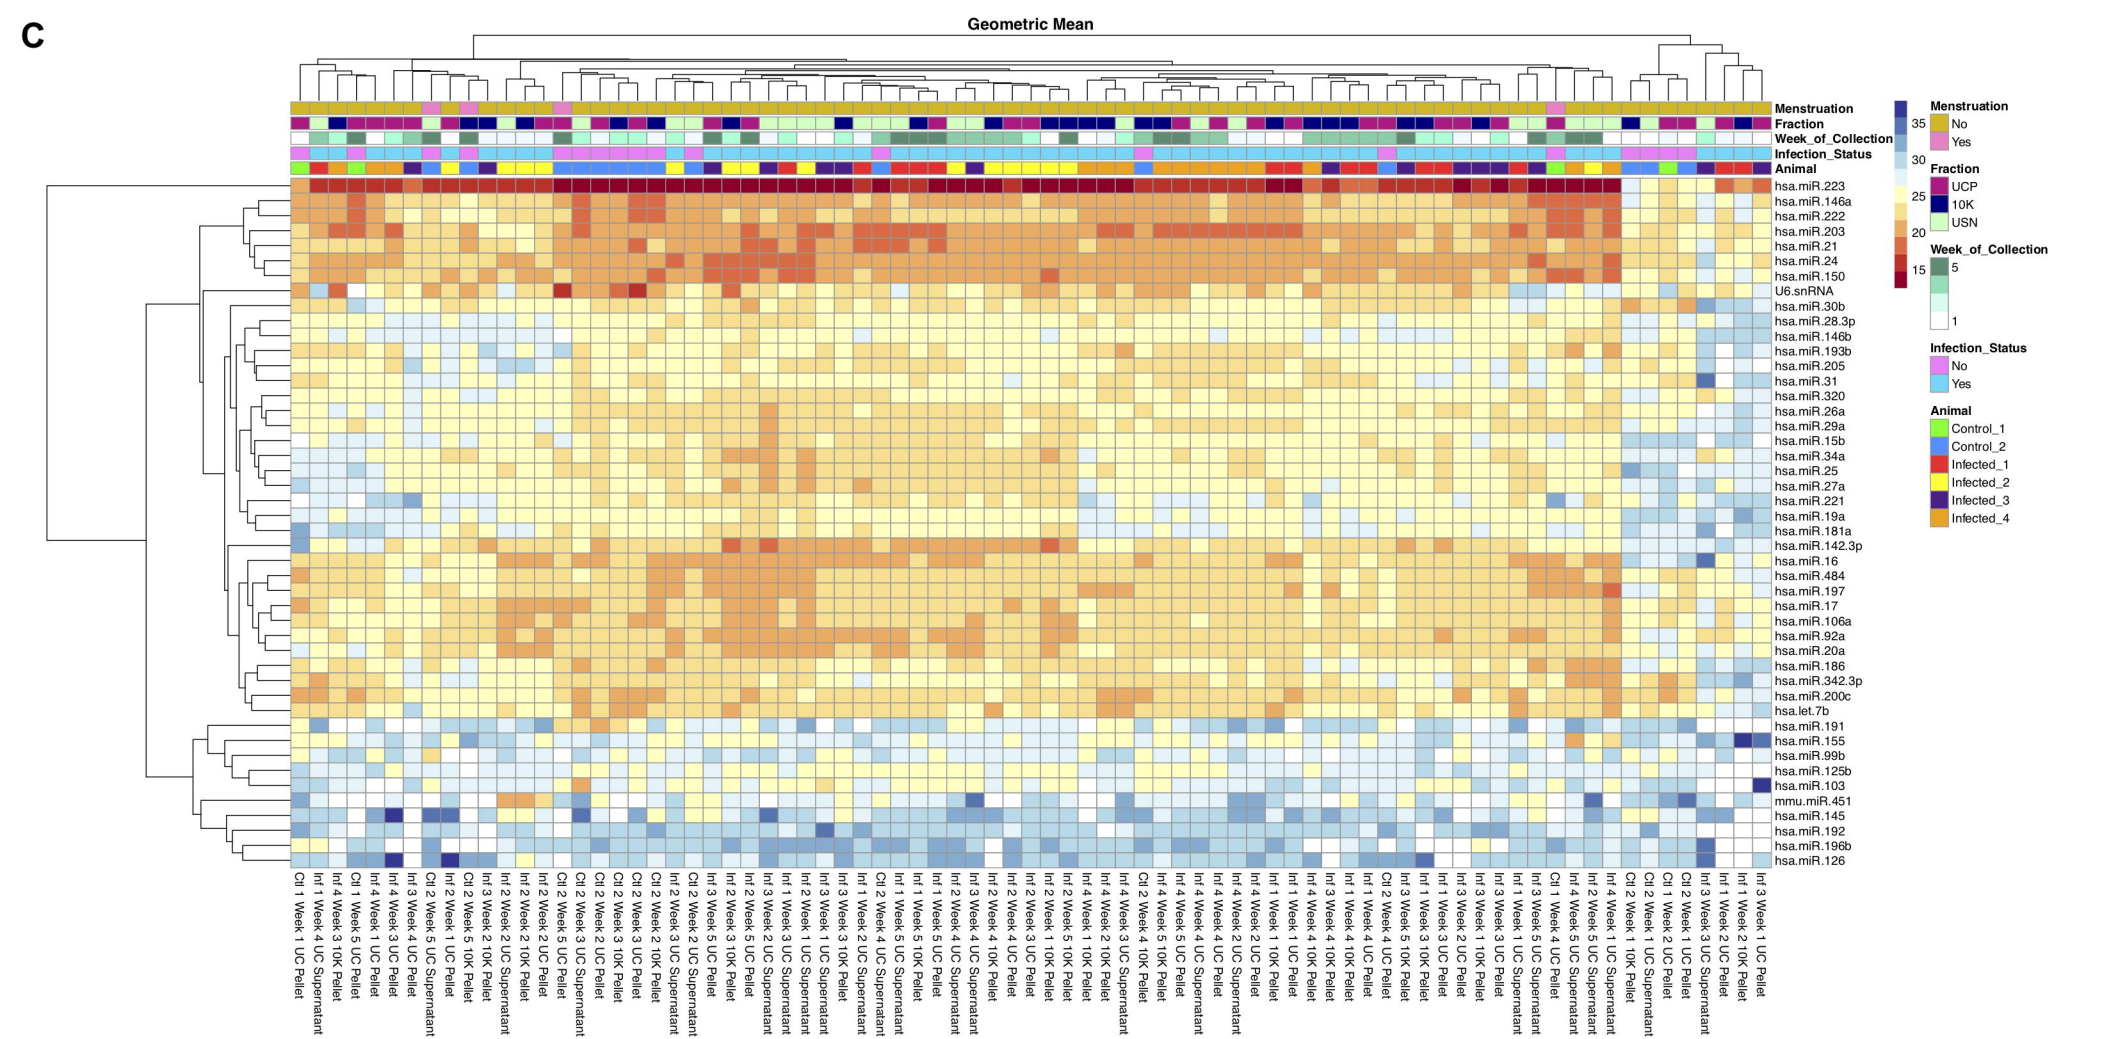

A

UC Supernatant

UC Pellet

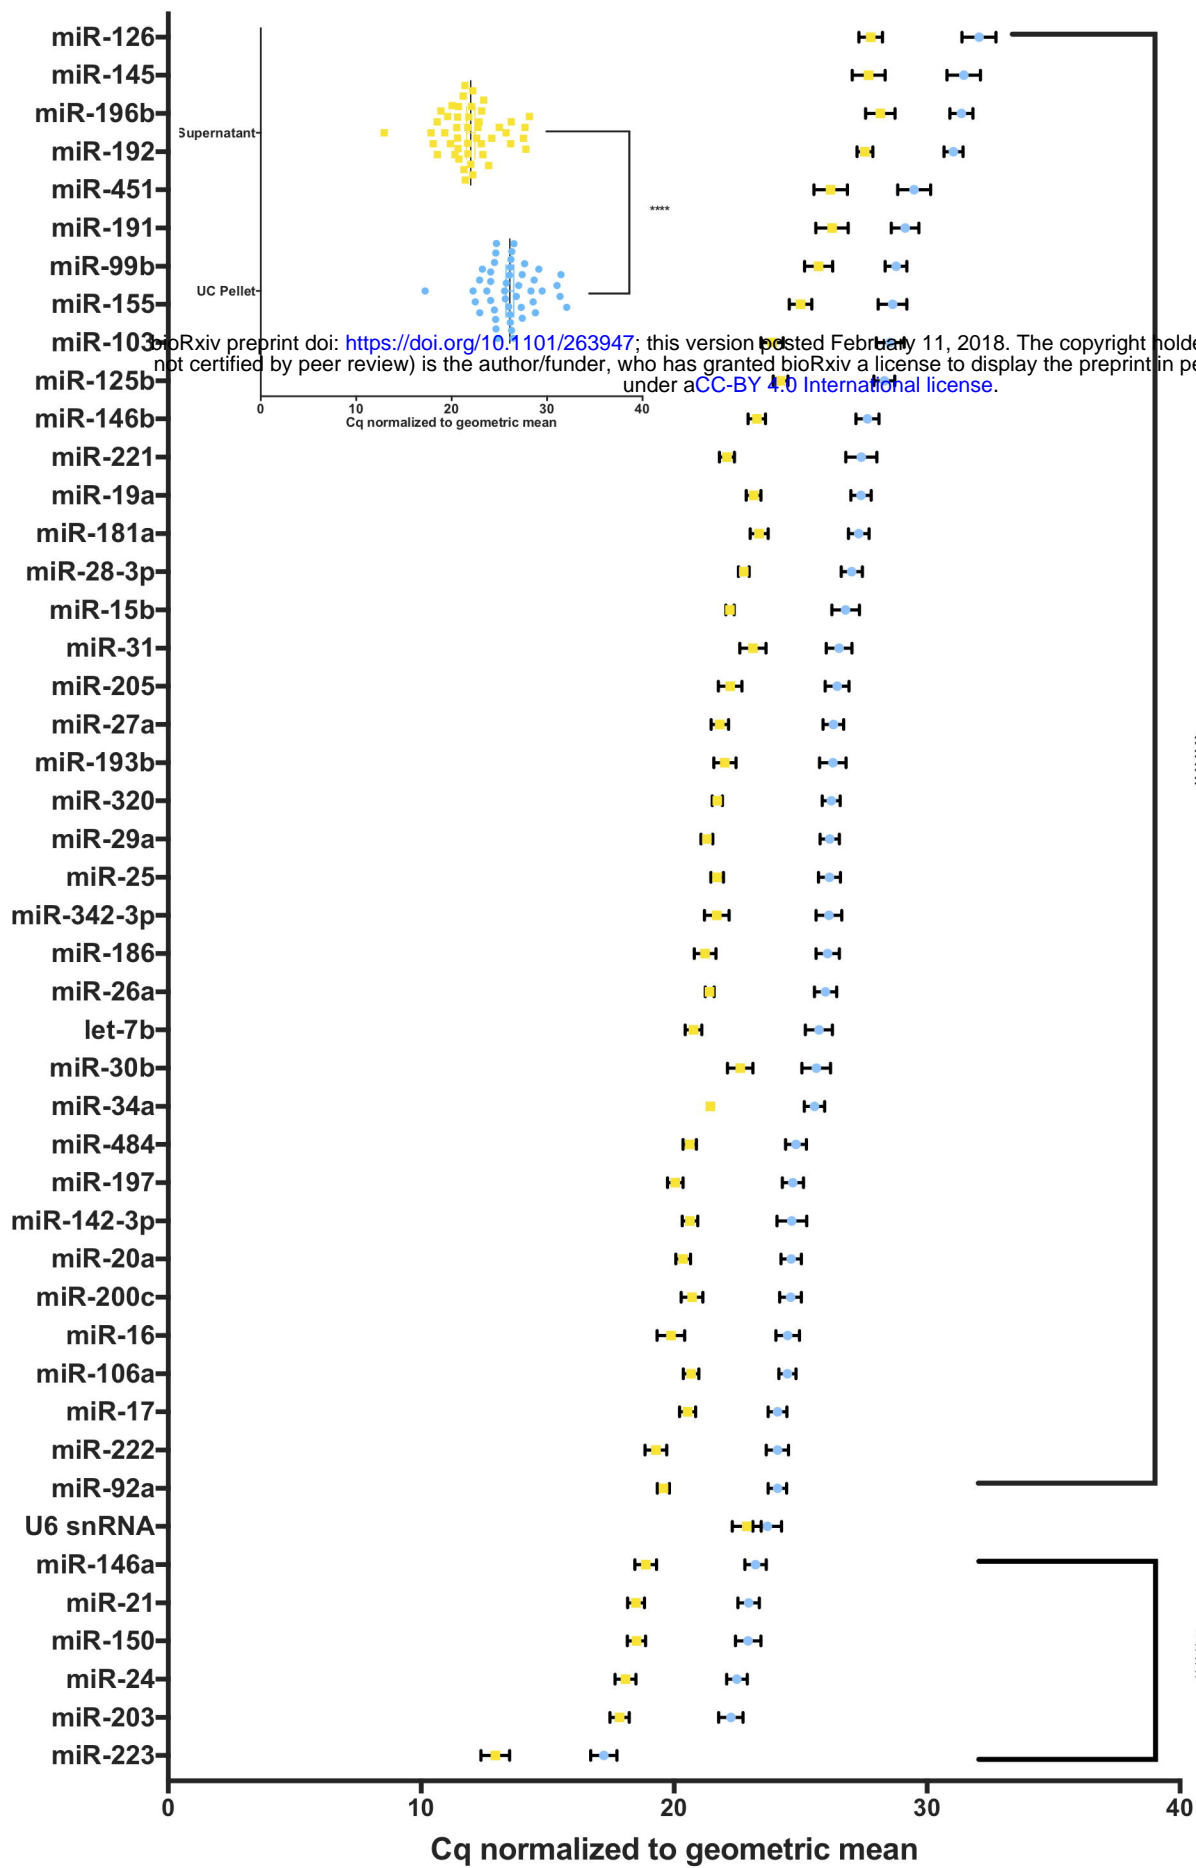

C

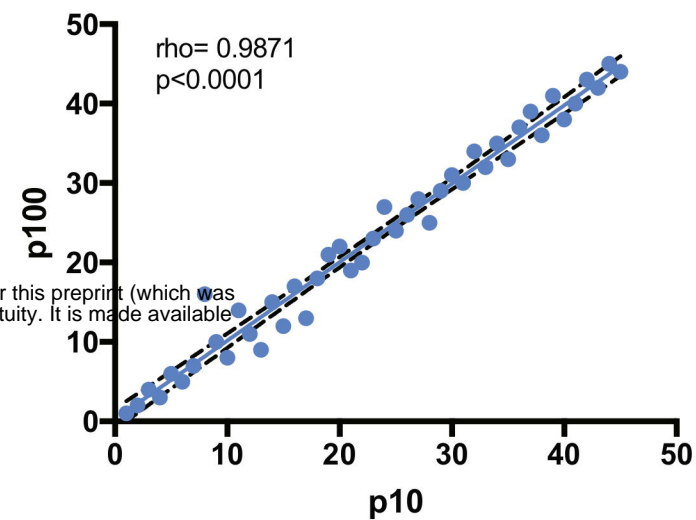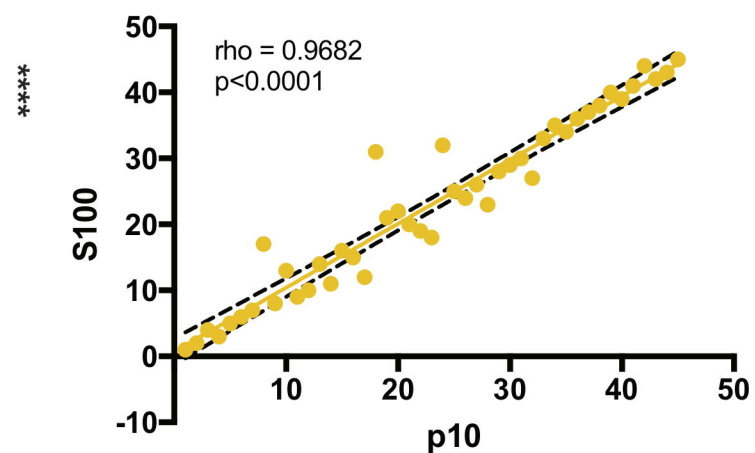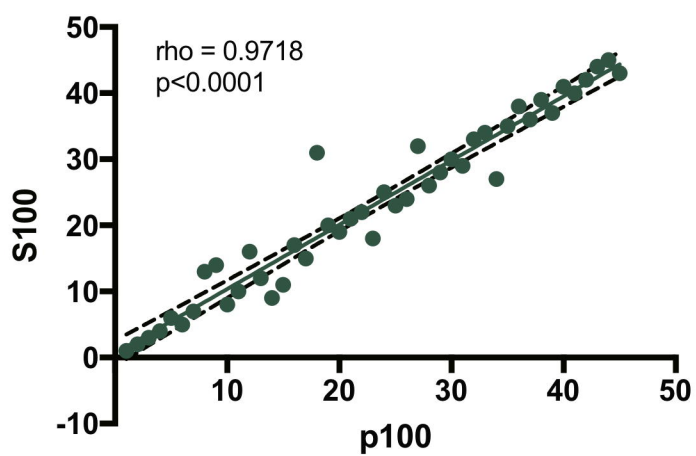

B

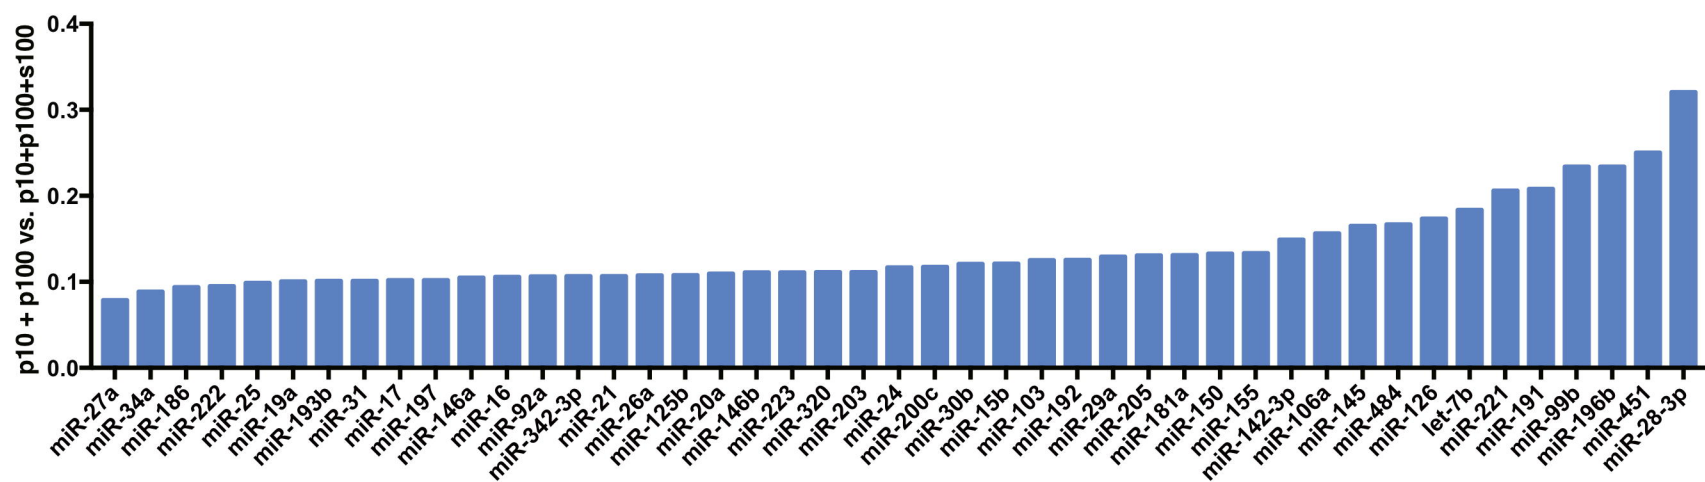

A

Relative Abundance

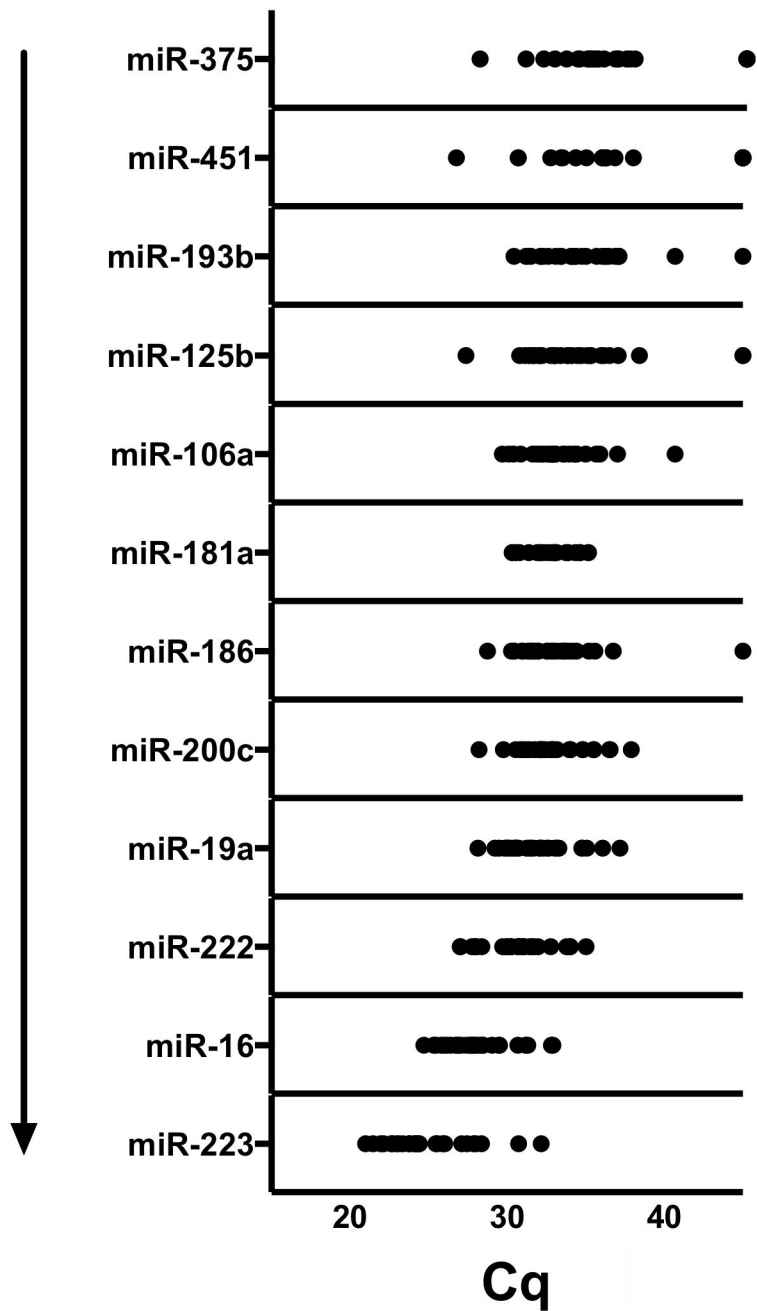

B

| Rank (qPCR) | miRNA       | Rank (TLDA) |
|-------------|-------------|-------------|
| 1           | miR-223-3p  | 1           |
| 2           | miR-16-5p   | 3           |
| 3           | miR-222-3p  | 2           |
| 4           | miR-19a-3p  | 9           |
| 5           | miR-200c-3p | 4           |
| 6           | miR-186-5p  | 6           |
| 7           | miR-181a-5p | 8           |
| 8           | miR-106a-5p | 5           |
| 9           | miR-125b-5p | 10          |
| 10          | miR-193b-3p | 7           |
| 11          | miR-451a-5p | 11          |



**A****TLDA**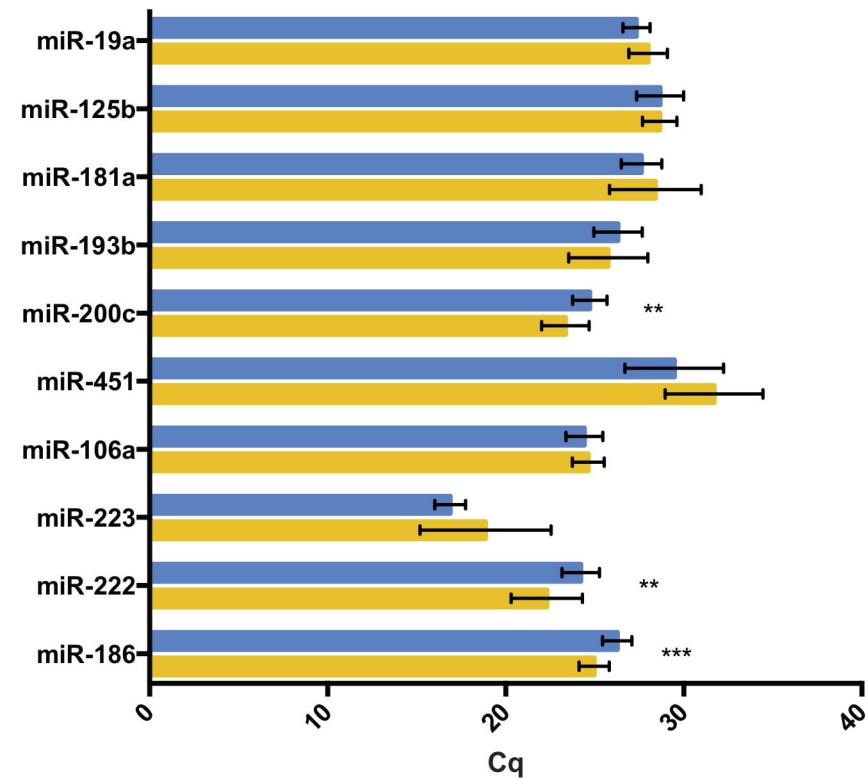**B****qPCR**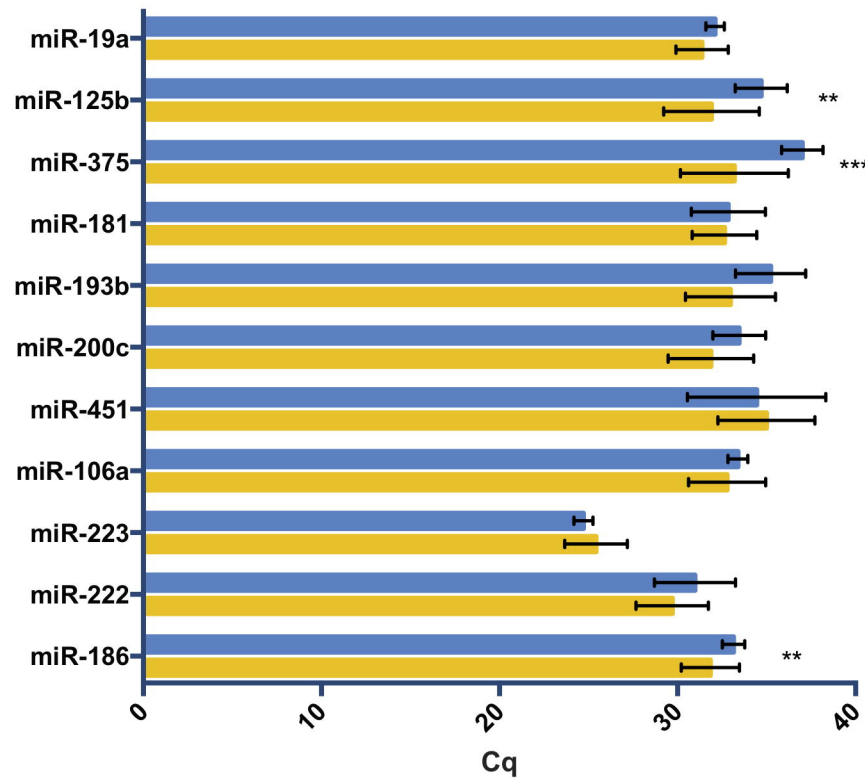

Uninfected

Infected

**A**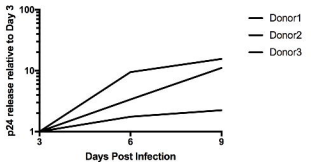**B**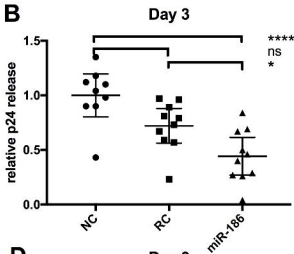**C**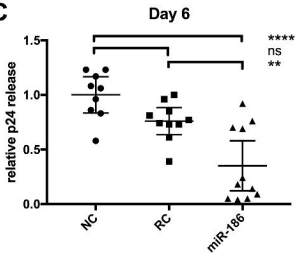**D**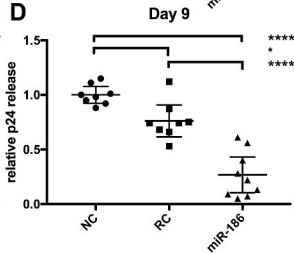

**A****Day 3**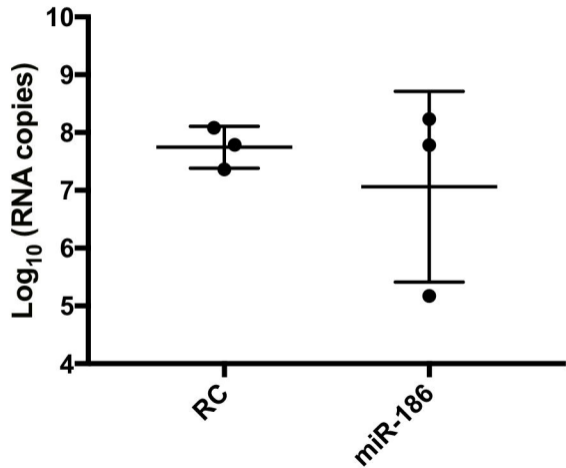**B****Day 6**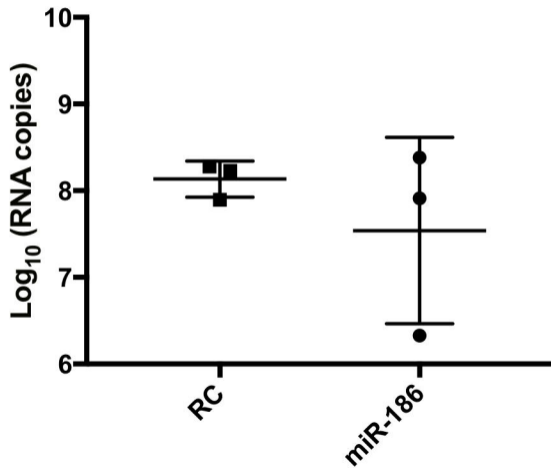

Source: https://www.biorxiv.org/content/10.1101/263947v1.full.pdf
